1

1 **Title**

2 **Altered effective connectivity from the posterior insula to**  
3 **the amygdala mediates the relationship between**  
4 **psychopathic traits and concern with the Harm foundation**

5 **Author names and affiliations**

6 **Shuer Ye<sup>1,2#</sup>, Wei Li<sup>1,2#</sup>, Bing Zhu<sup>3</sup>, Yating Lv<sup>4\*</sup>, Qun Yang<sup>1,2\*</sup>, Frank Krueger<sup>5</sup>**

7 <sup>1</sup> Department of Psychology, School of Education, Hangzhou Normal University,  
8 Hangzhou, China

9 <sup>2</sup> Institute of Psychological Science, Hangzhou Normal University, Hangzhou, China

10 <sup>3</sup> School of Marxism, Zhejiang Yuexiu University, China

11 <sup>4</sup> Centre for Cognition and Brain disorder, the affiliated Hospital of Hangzhou Normal  
12 University

13 <sup>5</sup> Department of Bioengineering, George Mason University, Fairfax, VA, USA

14 **\*Corresponding authors:**

15 Yating Lv, [lvuyating198247@gmail.com](mailto:lvuyating198247@gmail.com); Qun Yang, [qunyang@hznu.edu.cn](mailto:qunyang@hznu.edu.cn)

16 # The two authors contributed equally to the research.

17 **Manuscript Information**

18 Number of pages:30| Number of figures/tables:5/3| Number of words for Abstract/

19 Manuscript:195/4790

20 **Keywords**

21 psychopathic traits, harm, effective connectivity, insula, amygdala

22

23

---

2

24 **Abstract**

25 Psychopathic traits have been demonstrated to be associated with different types of  
26 morality; however, the neuropsychological mechanism underlying the relationship  
27 between psychopathic traits and morality remains unclear. Our study examined the  
28 effective connectivity (EC) of psychopathic traits-related brain regions and its  
29 association to concern with different moral foundations by combining behavioral  
30 measures with resting-state fMRI. We administered the Levenson Self-Report  
31 Psychopathy Scale (LSRP) and Moral Foundation Questionnaire (MFQ) to 78 college  
32 students after resting-state fMRI scanning. Our results showed that total and primary  
33 psychopathic traits score predicted concern with the Harm foundation. The EC from  
34 the posterior insula to the amygdala was negatively correlated with psychopathic traits  
35 and positively with concern with the Harm foundation. Altered posterior insula-  
36 amygdala EC partially mediated the relationship between psychopathic traits and  
37 concern with the Harm foundation. Our findings indicated that individuals with  
38 elevated psychopathic traits may have atypical processes in recognizing and  
39 integrating bodily state information into emotional responses, leading to less concern  
40 for harm-related morality. The study deepened our understanding of the  
41 neuropsychological mechanism underlying the relationship between psychopathic  
42 traits and morality and may have implications for the prevention of higher  
43 psychopathic traits individuals from committing serious transgressions.

44

45 **Keywords:** psychopathic traits; moral foundations; Granger Causality; amygdala,  
46 posterior insula

---

## 47 INTRODUCTION

48 Psychopathy has been recognized as a personality disorder, primarily characterized by  
49 problematic interpersonal relations, shallow affect, poor behavioral control,  
50 irresponsibility, and disregard of moral norms (Hare, 1991, 2003). There are two  
51 subtypes of psychopathy, including primary psychopathy and secondary psychopathy.  
52 Primary psychopathy is associated with interpersonal and affective features whereas  
53 secondary psychopathy is linked to aggressive and antisocial lifestyles (Hare, 1991).  
54 Psychopathy has been increasingly recognized as a continuum of personality traits  
55 rather than a taxonomic feature (Corr, 2010). Those who are not clinically identified  
56 as psychopaths, but with higher psychopathic traits, may also show typical  
57 psychopathic characteristics (Brennan et al., 2018; Djeriouat & Trémolière, 2014;  
58 Neumann & Hare, 2008).

59 Individuals with elevated psychopathic traits may engage in various immoral  
60 behaviors, posing challenges to societies in maintaining social order (Beaver et al.,  
61 2017). Therefore, the relationship between psychopathic traits and moral cognition is  
62 of great interest to many researchers (Blair, 2007; Gao & Tang, 2013; Marsh et al.,  
63 2011). Moral Foundation Theory (MFT), a widely known framework on human  
64 morality, provides a new perspective for investigating the relationship between  
65 psychopathic traits and morality (Gay et al., 2018). According to this theory, morality  
66 consists of five foundations: (1) Harm (preventing harm to others); (2) Fairness  
67 (preserving fairness, equal rights, and justice); (3) Loyalty (practicing loyalty to one's  
68 own group); (4) Authority (respecting authority and social order); and (5) Purity  
69 (pursuing purity or sanctity of body, mind, and soul) (Haidt, 2012; Haidt & Graham,  
70 2007).

71 Psychopathic traits have been consistently shown to be associated with concern

---

4

72 with different moral foundations (Aharoni et al., 2011; Fernandes et al., 2020). This  
73 relation was especially pronounced for the Harm and Fairness foundations (Aharoni et  
74 al., 2011; Glenn et al., 2009a; Marshall et al., 2018). Individuals scoring higher in  
75 psychopathic traits are significantly less likely to endorse the Harm and Fairness  
76 foundations in the community (Glenn et al., 2009a) and forensic samples (Aharoni et  
77 al., 2011). Furthermore, emotion may serve as a mediator in the relationship between  
78 psychopathic traits and morality (Glenn et al., 2009a; Patil, 2015; Ye et al., 2021). For  
79 example, a lower level of empathic concern predicts less endorsement for preventing  
80 harm and unfairness in individuals with elevated psychopathic traits (Glenn et al.,  
81 2009a). Our recent study showed that unpleasantness plays a mediating role in  
82 psychopathic traits and moral judgment especially for the Harm and Fairness  
83 foundations (Ye et al., 2021). However, few studies have yet directly examined the  
84 underlying neural substrates of the relationship between psychopathic traits and  
85 concern with the moral foundations. Our current paper aims to explore the neural  
86 mechanism underlying the relationship between psychopathic traits and morality  
87 under the framework of MFT.

88 To date, much of our knowledge about the neural mechanism of the relationship  
89 between psychopathic traits and morality is from task-dependent fMRI studies, which  
90 associate blood oxygenation level-dependent (BOLD) signals with moral judgments  
91 for individuals with higher psychopathic traits. In particular, many of these studies  
92 revealed altered brain functions in brain regions supporting emotion processing, such  
93 as the amygdala. For example, individuals with elevated psychopathic traits show  
94 decreased activation in the amygdala during moral decision-making (Glenn et al.,  
95 2009b; Harenskia et al., 2014; Yoder et al., 2015). Youths with higher psychopathic  
96 traits show reduced functional connectivity between the amygdala and orbitofrontal

---

5

97 cortex (OFC) when making moral judgments ([Marsh et al., 2011](#)). In addition, male  
98 inmates with higher psychopathic traits demonstrate decreased functional connectivity  
99 between the amygdala and right temporoparietal junction when viewing morally bad  
100 scenarios ([Yoder et al., 2015](#)).

101 Task-independent resting-state fMRI (RS-fMRI) offers an appealing alternative  
102 to characterize the neural functions of individuals with mental health concerns  
103 ([Philippi et al., 2015](#)). RS-fMRI measures intrinsic brain functions by scanning  
104 participants while they maintain a relatively relaxed state in a scanner. Compared with  
105 task-fMRI, RS-fMRI measures have a better signal to noise ratio and have good  
106 reliability ([Fox & Greicius, 2010](#)). Recent evidence has shown altered resting-state  
107 architecture of functional brain organization associated with psychopathic traits. In  
108 particular, abnormal functional connectivity between limbic-paralimbic structures  
109 (e.g., insula, amygdala, and posterior cingulate cortex [PCC]) and prefrontal areas  
110 (e.g., ventromedial prefrontal cortex [vmPFC], dorsal medial prefrontal cortex  
111 [dmPFC], ventrolateral prefrontal cortex, and dorsolateral prefrontal cortex) have  
112 been shown to be related to elevated psychopathic traits ([Contreras-Rodriguez et al.,  
113 2014; Motzkin et al., 2011](#)). Overall, RS-fMRI findings also reveal altered functional  
114 connectivity between emotional-related brain regions (e.g., the amygdala) and other  
115 brain areas including the prefrontal areas for individuals with higher psychopathic  
116 traits ([Blair, 2007; Contreras-Rodriguez et al., 2014; Espinoza et al., 2019; Motzkin et  
117 al., 2011](#)). However, those RS-fMRI studies have provided little information about  
118 how resting-state functional connectivity between those regions of interest underlie  
119 the relationship of psychopathic traits to moral cognition. Especially, little is known  
120 about the direction of these connections (i.e., functional connectivity, FC) during  
121 moral cognition for people with elevated psychopathic traits. Finding out the direction

---

6

122 of the information transmission between brain regions might deepen our  
123 understanding of the neural mechanism underlying the moral cognition for people  
124 with elevated psychopathic traits. For example, given the atypical emotional  
125 processing widely associated with psychopathic traits, we might want to know  
126 whether it is because brain regions supporting emotional functions send or receive  
127 atypical inputs from other brain regions.

128       Effective connectivity (EC) provides an estimation of the directional relationship  
129 between brain regions. Therefore, information about the possible causal influence of  
130 one region on another can be inferred (Friston & Moran, 2013). Granger causality  
131 analysis (GCA ) is a data-driven method for investigating the effective connectivity  
132 between recorded time series of brain regions without a prior specification of causal  
133 setting (Seth et al., 2015). Using this method might increase our knowledge about the  
134 atypical neural circuits associated with moral cognition for individuals with higher  
135 psychopathic traits in terms of causal relationships between brain regions without a  
136 prior hypothesis of the brain connectivity models.

137       In our study, we aimed to utilize a GCA approach to explore the intrinsic neural  
138 signatures for the relationship between psychopathic traits and concern with different  
139 moral foundations. We focused on brain regions that have been proved to be  
140 significantly associated with psychopathic traits in a recent meta-analysis including  
141 the amygdala, dmPFC, PCC, anterior cingulate cortex (ACC), OFC, and hippocampus  
142 (Deming & Koenigs, 2020). Given the essential role of emotion in the relationship  
143 between psychopathic traits and moral cognition (Glenn et al., 2009a; Patil, 2015; Ye  
144 et al., 2021), we expected that the EC from brain regions that are particularly related  
145 to emotional function (e.g., amygdala) to other brain regions might mediate the  
146 relationship between psychopathic traits and moral foundations, especially for the

---

7  
147 Harm and Fairness foundations. In other words, those brain areas supporting  
148 emotional function might exert atypical influence on other brain regions during moral  
149 cognition for individuals with elevated psychopathic traits. Additionally, We expected  
150 our findings to be more pronounced for primary psychopathy than secondary  
151 psychopathy as recently we found psychopathic traits are correlated with moral  
152 judgments merely in primary psychopathy (Ye et al., 2021).

---

## 153 **METHOD**

### 154 **Participants**

155 Seventy-eight college students from local universities participated in this study. All  
156 the participants were right-handed and in healthy condition. No participants reported  
157 any history of neurological or psychiatric disorder. During the study, one participant  
158 failed to complete the questionnaires, five participants were detected to provide  
159 inappropriate answers in the bogus items in MFQ, and two participants had head  
160 motions exceeding 2° during scanning. These participants were excluded from further  
161 analyses, leaving a final sample of 70 participants (29 males;  $22.71 \pm 2.51$  years old,  
162 range: 18–30 years old) (**Tab.1**). The study was approved by the Ethical Committee of  
163 Hangzhou Normal University. All the participants provided written informed consent  
164 in accordance with the Declaration of Helsinki and were compensated by cash.

165 **--- Insert Table 1 about here ---**

166

### 167 **Measures and Procedure**

#### 168 *Measures*

169 *Levenson Self-Report Psychopathy Scale (LSRP)* Psychopathic traits were assessed  
170 with the LSRP which has been well validated in the community sample ([Levenson et](#)  
171 [al., 1995](#)). The scale consists of 26 items, each of which can be scored on a 4-point  
172 Likert scale ranging from 1 (strongly disagree) to 4 (strongly agree). The  
173 questionnaire includes two separate subtypes of psychopathy (i.e., primary  
174 psychopathy and secondary psychopathy). Primary psychopathy corresponds to  
175 Factor 1 (interpersonal/affective traits) whereas secondary psychopathy corresponds  
176 to Factor 2 (lifestyle/antisocial traits) of The Psychopathy Checklist-Revised which is  
177 a structured clinical assessment. The higher scores on the scale indicate higher

---



9

178 psychopathic traits (Lynam et al., 1999). The Chinese version of the LSRP has been  
179 proved to have good reliability (M.-C. Wang et al., 2018). The Cronbach's alpha was  
180 0.76 (total psychopathic traits score [T-PTS]), 0.72 (primary psychopathic traits score  
181 [P-PTS]) and 0.59 (secondary psychopathic traits score [S-PTS]) in the present  
182 sample.

183 *Moral Foundation Questionnaire (MFQ)* The concern with different moral  
184 foundations were evaluated by the MFQ, which consists of 32 items (Graham et al.,  
185 2009). The scale contains two sections. The first section measures the moral relevance  
186 of different moral considerations on a six-point Likert scale ranging from 0 (not at all  
187 relevant) to 5 (extremely relevant) while the second section measures the degree to  
188 which participants agreed or disagreed with stated moral views on a six-point Likert  
189 scale ranging from 0 (strongly disagree) to 5 (strongly agree). The scores of five  
190 moral foundations (i.e., Harm, Fairness, Loyalty, Authority, and Purity) were  
191 calculated respectively, with higher scores indicating higher concern of the  
192 corresponding moral foundation. The questionnaire has been well-validated in  
193 Chinese sample (Du, 2019; R. Wang et al., 2019). The Cronbach's alpha of subscales  
194 was 0.41 (Harm), 0.58 (Fairness), 0.53 (Loyalty), 0.61(Authority) and 0.62 (Purity) in  
195 the present sample.

#### 196 *Procedure*

197 Participants completed two questionnaires after undergoing task-free fMRI. The order  
198 of the two questionnaires were counterbalanced among participants.

199

#### 200 **Behavioral data analyses**

201 The statistical analyses for questionnaire measures were performed using SPSS  
202 Version 23.0 (IBM Corp. Released 2015) with an alpha value of  $p < 0.05$  (two tailed).

---

10

203 Linear regression analyses were performed to examine whether total LSRP score,  
204 primary psychopathy, and secondary psychopathy could predict concern with the five  
205 moral foundations after controlling the demographic regressors (i.e., age and gender).

206

### 207 **Imaging acquisition**

208 All MRI data were acquired at the Center for Cognition and Brain Disorders of  
209 Hangzhou Normal University using a 3T MRI scanner (GE Discovery 750 MRI,  
210 General Electric, Milwaukee, WI, USA). The participants were scanned for 8 minutes  
211 and instructed to keep their eyes closed and remain awake without performing any  
212 systematic thinking. Head motion was minimized using foam padding and restraint.

213 The imaging parameters of the EPI sequence were as follows: repetition time (TR) =  
214 2000ms; interleaved 43 slices; echo time (TE) = 30 ms; thickness = 3.2mm; flip angle  
215 = 90°; field of view (FOV) = 220 × 220 mm<sup>2</sup>; and matrix size = 64 × 64. Each fMRI  
216 scan included 240 imaging volumes. In addition, a high-resolution 3D T1-weighted  
217 anatomical image was also acquired using a magnetization prepared gradient echo  
218 (MP-RAGE) sequence with following imaging parameters: 176 sagittal slices; TR =  
219 8,100ms; slice thickness = 1 mm; TE = 3.1ms; flip angle = 8°; FOV = 250 × 250 mm.

220

### 221 **Preprocessing**

222 The neuroimaging data were preprocessed using the DPABI software package based  
223 on SPM12 (Yan et al., 2016). The first 10 volumes of the functional images were  
224 discarded to eliminate the non-equilibrium effects of magnetization. Then, slice  
225 timing and head motion correction were applied. Corrected functional images were  
226 registered to the corresponding T1-weighted anatomical image and spatially  
227 transformed to the standard MNI space with 3 × 3 × 3 mm<sup>3</sup> voxels. A band-pass

---

11

228 temporal filtering (0.01–0.1 Hz) was subsequently applied to the time series to reduce  
229 the effect of low-frequency drifts and high-frequency physiological noise. Next, the  
230 images were spatially smoothed using an isotropic Gaussian kernel with 4mm full  
231 width at half maximum to decrease spatial noise. Finally, the linear trends of time  
232 courses were removed, and three common nuisance variables including 24 head-  
233 motion parameters and averaged signals from the cerebrospinal fluid and white matter  
234 were regressed out.

235

### 236 **Selection of the regions of interest**

237 To access the EC of the regions that are most relevant to psychopathic traits, a priori  
238 seed regions of interest (ROIs) were selected that have been identified from a meta-  
239 analysis (Deming & Koenigs, 2020): anterior cingulate cortex (ACC), dorsomedial  
240 prefrontal cortex (dmPFC), inferior frontal gyrus (IFG), posterior orbitofrontal cortex  
241 (OFC), amygdala, hippocampus, and calcarine (Tab.2). Each ROI was centered on the  
242 coordinates in MNI space provided by the meta-analysis and include a radius sphere  
243 of 5 mm (Fig.1b).

244 --- Insert Table 2 and Figure 1 about here ---

245

### 246 **Granger causality analysis**

247 Bivariate coefficient-based GCAs were performed to examine EC among ROIs and  
248 each voxel of the whole brain using the REST v1.8 toolbox (Song et al., 2011; Zang et  
249 al., 2012). This GCA approach assumes that if including past values of a BOLD time  
250 series x lead to better prediction of the current value of time series y, then series x  
251 causes series y (Roebroeck et al., 2005). Here, the BOLD time series of each ROI was  
252 defined as the seed time series x, and the time series of voxels within the whole brain

---

12

253 were defined as the time series  $y$ . The positive value of EC from series  $x$  to series  $y$   
254 indicates an excitatory effect that series  $x$  imposes on series  $y$ , whereas the negative  
255 value was interpreted as an inhibitory effect (Zang et al., 2012). Finally, Fisher's  $r$ -to-  
256  $z$  transformations were implemented (Fig.1c).

257

### 258 **Partial correlation analyses**

259 Voxel-wise EC for all seed ROIs significantly associated with psychopathic traits (T-  
260 PTS, P-PTS, and S-PTS) were examined by using partial correlation analyses with  
261 age and gender as covariates (Fig.1d). To correct for multiple comparisons, family-  
262 wise error (FWE) correction with Gaussian random field theory was applied, in which  
263 the voxel threshold was set to  $p < 0.001$  and the cluster threshold was set to  $p < 0.05$   
264 with two tails. Next, the relationship between the neuroimaging findings (i.e., EC  
265 significantly related to psychopathic traits) and concern with the five moral  
266 foundations was examined (Fig.1e). The values of EC that was significantly related to  
267 psychopathic traits were extracted. Then, Pearson correlation analyses were further  
268 conducted to examine the relationship between these EC values and concern with the  
269 five moral foundations with age and gender as covariates. Here, Bonferroni correction  
270 for multiple comparisons ( $n = 65$ ) was applied to control the false-positive results.

271

### 272 **Mediation analyses**

273 For the EC that was significantly associated with both psychopathic traits and the  
274 concern with the five foundations, mediation analyses were conducted to examine  
275 whether relationship between psychopathic traits and moral concern was mediated by  
276 the EC (Fig.1f). The mediation analyses were conducted by applying Bootstrapping  
277 PROCESS for SPSS with age and gender as covariates. The Bootstrap samples were

---

13

278 set as 5,000, and the confidence level (CI) for confidence intervals was set as 95%.

279 The CI which does not include zero suggests a significant mediation role in the

280 relationship between psychopathic traits and the concern with the five foundations.

---

## 281 **RESULTS**

### 282 **Relationship between psychopathic traits and five moral foundations**

283 The relationship between psychopathic traits and concerns with the moral foundations  
284 were examined by establishing linear regression models. The results showed that  
285 concern with the Harm foundation was significantly predicted by T-PTS ( $\beta = -0.461, p$   
286  $< 0.001$ ) and P-PTS ( $\beta = -0.498, p < 0.001$ ). However, psychopathic traits did not  
287 predict concern with the other four foundations (i.e., Fairness, Loyalty, Authority and  
288 Purity) (**Tab. 3**).

289 **--- Insert Table 3 about here ---**

### 290 **Relationship between psychopathic traits and EC**

291 Partial correlation analyses were conducted to examine the voxel-wise EC that were  
292 significantly associated with psychopathic traits. The results showed that T-PTS was  
293 significantly related to the EC from the posterior insula to the amygdala, from the  
294 dmPFC to the middle temporal gyrus and precentral gyrus, and from the PCC to the  
295 dmPFC (**Fig.2**). P-PTS was significantly correlated with the EC from the posterior  
296 insula and supramarginal gyrus to the amygdala, from the dmPFC to the precentral  
297 gyrus and IPL, from the PCC to the dmPFC, and from the ACC to the middle  
298 temporal gyrus (**Fig.3**). However, no EC was found to be significant correlated with  
299 S-PTS. The detailed results for the relationship between the EC and psychopathic  
300 traits are shown in Table 4.

301 **--- Insert Figures 2, 3, and 4 about here ---**

### 302 **Relationship between concern with moral foundations and EC that were** 303 **significantly related to psychopathic traits**

304 Partial correlation analyses were further conducted between the EC that was  
305 significantly associated with psychopathic traits and concern with the Harm

---

15

306 foundations. For the EC that was significantly correlated with T-PTS, a positive  
307 correlation between the EC from the posterior insula to the amygdala and the Harm  
308 foundation and a negative correlation between the EC from the dmPFC to the  
309 precentral gyrus and the Harm foundation was found. For the EC that was  
310 significantly correlated with P-PTS, a positive correlation between the EC from the  
311 posterior insula to the amygdala and the Harm foundation, and a negative correlation  
312 between the EC from the amygdala to the supramarginal gyrus and the Harm  
313 foundation were found. However, no correlations were found between the other four  
314 foundations and the EC that was significantly related to psychopathic traits (see **Tab.**  
315 **4**).

316

### 317 **Mediation analysis**

318 For EC significantly correlated with both psychopathic traits and concern with the  
319 Harm foundation (i.e., EC from the posterior insula to the amygdala, and from the  
320 dmPFC to the precentral gyrus), mediation analyses were further performed to  
321 investigate whether the EC mediated the relationship between psychopathic traits and  
322 the concern with the Harm foundation. The indirect effect of T-PTS through the EC  
323 from the posterior insula to the amygdala (95% CI = [-0.150, -0.003]) on the Harm  
324 foundation was significant. The direct effect of T-PTS on the Harm foundation was  
325 still significant when the EC was included as a mediator (95%CI = [-0.268, -0.025]),  
326 indicating that the EC from the posterior insula to the amygdala partially mediated the  
327 relationship between T-PTS and concern with the Harm foundation. No mediation  
328 effect of T-PTS through the EC from the dmPFC to the precentral gyrus on the Harm  
329 foundation was observed (95%CI = [-0.128, 0.169]) (**Fig.4**).

330

--- **Insert Figure 4 about here** ---

---

16

331 Similarly, the indirect effect of P-PTS through the EC from the posterior insula  
332 to amygdala (95%CI = [-0.400, -0.041]) on the Harm foundation was significant, but  
333 the indirect effect of P-PTS through EC from the amygdala to the supramarginal  
334 gyrus (95%CI = [-0.163, 0.020]) was not significant, Moreover, the direct effect of P-  
335 PTS on the Harm foundation was still significant when the EC was included as a  
336 mediator (95%CI = [-0.249, -0.001]), indicating that the EC from the posterior insula  
337 to the amygdala partially mediated the relationship between P-PTS and concern with  
338 the Harm foundation (**Fig. 5**).

339

**--- Insert Figure 5 about here --**

---



340 **DISCUSSION**

341 This study combined self-report questionnaires with RS-fMRI EC to reveal the  
342 intrinsic neuropsychological mechanism of the relationship between psychopathic  
343 traits and concern with different moral foundations. At the behavior level, we found  
344 that T-PTS and P-PTS predicted moral concern with the Harm foundation, but not the  
345 other four foundations. At the neural level, we found that reduced EC from the  
346 posterior insula to the amygdala was associated with higher psychopathic traits and  
347 greater concern for the harm foundation. Furthermore, the EC from the posterior  
348 insula to the amygdala partially mediated the relationship between T-PTS/P-PTS and  
349 concern with the Harm foundation. Our findings provided the first neural evidence for  
350 less concern with the harm foundation for individuals with higher psychopathic traits  
351 and deepened our understanding of the underlying mechanism of atypical moral  
352 cognition associated with psychopathic traits.

353 Our behavioral results demonstrated that T-PTS and P-PTS significantly  
354 predicted moral concern with Harm foundation only. This is consistent with previous  
355 studies which reported significant association between psychopathic traits and  
356 different moral foundations, with the effects being most pronounced for the Harm  
357 foundation (Aharoni et al., 2011; Gay et al., 2018; Glenn et al., 2009a; Marshall et al.,  
358 2018). Perception of harm is intuitive, forming the fundamental basis of moral  
359 judgment (Haidt & Joseph, 2004; Schein & Gray, 2017). A systematic review  
360 suggested that psychopathy is primarily associated with compromised care-based  
361 morality involving moral reasoning about harmful actions to others (Blair, 2007).  
362 Here, we provided more evidence that psychopathic traits are more related to harm-  
363 based moral cognition than other types of moral cognition.

364 Our neural results showed that decreased EC from the posterior insula to the

---

18

365 amygdala was associated with higher psychopathic traits. The amygdala and insula  
366 are core components of the salience network (SN), a large-scale brain network widely  
367 recognized to be involved in detection and integration of emotional and sensory  
368 stimuli (Geng et al., 2016). Both of the two regions take a crucial role in saliency  
369 processing, attention capturing and identification of emotional significance of the  
370 stimulus (Calder et al., 2001; Menon & Uddin, 2010; Phillips et al., 2003). Since  
371 dysfunctional emotional responses are characteristic features of individuals with  
372 higher psychopathic traits, atypical neural activity in the amygdala and insula is very  
373 likely to be associated with psychopathic traits (Blair, 2013; Dolan & Fullam, 2009;  
374 Ermer et al., 2012; Santana, 2016; Yang et al., 2009). For example, a systematic  
375 review suggested that brain regions implicated in psychopathic traits include the  
376 amygdala, insula, anterior and posterior cingulate, etc. (Santana, 2016). Individuals  
377 with higher psychopathic traits show reduced amygdala and insula volume (Ermer et  
378 al., 2012; Yang et al., 2009), as well as decreased neural activity in the amygdala and  
379 insula (Blair, 2013; Dolan & Fullam, 2009). Furthermore, individuals with higher  
380 psychopathic traits show altered anatomical and functional connectivity between the  
381 two regions and other brain areas, and between the two regions themselves during  
382 socio-moral decision making (Fumagalli & Priori, 2012; Han et al., 2016; Shenhav &  
383 Greene, 2014).

384       The insula is anatomically and functionally connected with the amygdala  
385 (Augustine, 1985, 1996; Gasquoine, 2014; Sethi et al., 2018; J. L. Stein et al., 2007).  
386 This pathway constitutes a part of the network associated with salience and emotion  
387 processing (Baur et al., 2013; Geng et al., 2016). The insula has been commonly  
388 recognized to translate bodily state information into emotional feelings (Dennis et al.,  
389 2011; Uddin, 2014; Yu et al., 2015). The interoceptive signals arrived in the posterior

---

19

390 insula before being evaluated and represented in the anterior insula (Craig & Craig,  
391 2009; Straube & Miltner, 2011). The right posterior insula is considered to be  
392 especially involved in the awareness of one' own bodily states. When people pay  
393 more attention to their own emotions, the activities of the primary somatosensory  
394 cortex as well as the posterior insula increase (Straube & Miltner, 2011). The  
395 amygdala receives inputs of various sensory and emotional information from other  
396 brain regions (Diano et al., 2017; Hofmann & Straube, 2019) including the posterior  
397 insula. Evidence showed that resting-state connectivity between the amygdala and the  
398 posterior insula decreased with emotional dysregulation (Bebkoa et al., 2015). The  
399 amygdala may detect and integrate the bodily state information transmitted from the  
400 posterior insula to support adaptive emotional responses (Babaev et al., 2018; Bebkoo  
401 et al., 2015; Stein et al., 2007). We argued that as the EC from the posterior insula to  
402 the amygdala decreases, the capacity to recognize and integrate bodily state  
403 information into emotional responses might weaken for individuals with higher  
404 psychopathic traits.

405 Furthermore, we found that the EC from the posterior insula to the amygdala  
406 partially mediated the relationship between psychopathic traits and the concern with  
407 the Harm foundation. In conjunction with previous behavioral findings that emotion  
408 responses serve as a mediator in the relationship between psychopathic traits and  
409 morality (Glenn et al., 2009; Patil, 2015; Ye et al., 2021), the results here suggested  
410 that weakened capacity to integrate bodily-state information to emotional responses in  
411 individuals with elevated psychopathic traits in response to moral contexts accounts  
412 for their emotional shallowness, which partially contributes their atypical moral  
413 cognition. Importantly, the significant relationship between psychopathic traits and  
414 morality as well as the mediating role of the posterior insula-to-amygdala connectivity

---

20

415 in the relationship was only observed in T-PTS and P-PTS, but not S-PTS. These  
416 results concur with previous findings that only primary psychopathy is able to predict  
417 moral judgments in the contexts of sacrificial moral dilemmas (Takamatsu & Takai,  
418 2019) and every-day moral scenarios (Ye et al., 2021). Primary psychopathy covers  
419 interpersonal and affective features, whereas secondary psychopathy represents  
420 aggressive and antisocial lifestyles (Hare, 1991). The primary psychopathic subtype  
421 normally demonstrates significantly lower anxiety than the secondary subtype (Lee &  
422 Salekin, 2010; Skeem et al., 2007; Vaillancourt & Brittain, 2019). In addition, reduced  
423 amygdala and insula activity in response to fear stimuli is merely associated with the  
424 primary psychopathy (Sethi et al., 2018). Overall, our findings supported that primary  
425 psychopathy contributes remarkably more than the secondary psychopathy to the  
426 atypical moral cognition and the neural underpinnings of the relationship of the two  
427 subtypes of psychopathic traits to moral cognition might differ significantly.

428 It is noteworthy that the aforementioned neural finding (i.e., the posterior insula-  
429 amygdala EC) was restricted to the right hemisphere which is more frequently  
430 involved in the processing of all kinds of emotions, especially negative emotions  
431 (Bowu et al., 1988; Gainotti, 2019; Killgore & Yurgelun-Todd, 2007). For example,  
432 increased activations were observed in emotion-related brain regions anchored in the  
433 right hemisphere (e.g., the right vmPFC and right amygdala) during a facial emotion  
434 perception task, especially in the case of facial cues with negative emotions (Killgore  
435 & Yurgelun-Todd, 2007). Thus, the EC from the posterior insula to the amygdala  
436 related to psychopathic traits and morality was only found in the right hemisphere  
437 may be due to the lateralized processing of negative emotion.

438 Additionally, we found that the EC from the dmPFC to the precentral gyrus was  
439 significantly correlated with T-PTS and P-PTS. Increased EC from the dmPFC to the

---

21

440 precentral gyrus was associated with higher psychopathic traits. The dmPFC  
441 contributes to cognitive control and goal-oriented action selection ([Ridderinkhof et](#)  
442 [al., 2004](#); [Venkatraman et al., 2009](#)) whereas the precentral gyrus is responsible for  
443 the control of voluntary motor movement ([Loukas et al., 2011](#)). The altered EC from  
444 the dmPFC to the precentral gyrus might be linked to poorer behavioral control of  
445 individuals with higher psychopathic traits compared to those with lower  
446 psychopathic traits who are more capable of appropriately taking goal-oriented  
447 actions. However, we did not find any mediating effect of the EC from the dmPFC to  
448 the precentral gyrus on the relationship between psychopathic traits and morality.  
449 Therefore, the increased communication from the dmPFC to the precentral gyrus  
450 might be part of the intrinsic neural characteristics for psychopathic traits but not the  
451 potential neural mechanism for how psychopathic traits were linked to morality.

452         Several limitations of this study are noteworthy. First, only college students were  
453 included as the participants and the sample size was relatively modest. Replication in  
454 a larger community sample is needed in the future to enhance the generalizability of  
455 our findings. Second, some items in the MFQ items seem rather abstract and obscure  
456 for participants, leading to relatively low validity and reliability of the scale. More  
457 accessible measures for morality (e.g., daily moral scenarios) should be utilized in the  
458 future to improve the reliability and especially the external validity of the  
459 measurement ([Clifford et al., 2015](#); [Ye et al., 2021](#)). Third, ROIs used in the study  
460 were from a meta-analysis, which may bias the results as we may overlook other  
461 important brain areas (vmPFC, posterior cingulate, and superior temporal gyrus) that  
462 are related to psychopathic traits. In addition, the repetition time of RS-fMRI in our  
463 study was 2 s which is much slower than the neuron reaction time. However, many  
464 researchers believe that even in the case of using long TRs to collect fMRI data, GCA

---

22

465 still estimates the time-directional influences ([Liao et al., 2010](#) ; [Rajan et al., 2019](#)).

466 Finally, future studies should also examine the relationship between psychopathic

467 traits and moral concern in the Liberty foundation which was recently validated as a

468 new moral foundation ([Graham et al., 2018](#)).

469 Taken together, the present study revealed the underlying neuropsychological

470 signatures of the relationship between psychopathic traits and concern with different

471 moral foundations. Our findings demonstrated that T-PTS and P-PTS predicted

472 concern with the Harm foundation. Importantly, higher psychopathic traits were

473 associated with reduced EC from the posterior insula to the amygdala, which partially

474 mediated the relationship between psychopathic traits and concern with the Harm

475 foundation. These findings provided new evidence for the special role of psychopathic

476 traits in concern with different foundations and shed new light on the

477 neuropsychological mechanisms underlying the relationship between psychopathic

478 traits and morality. This study increases our knowledge about the atypical neural

479 circuits associated with moral cognition for higher-psychopathic-trait individuals in

480 terms of effective connectivity between brain regions and may have some

481 implications for early prevention of individuals with higher psychopathic traits from

482 committing serious transgressions.

483

484

---

485 **REFERENCE**

- 486 Aharoni, E., Antonenko, O., & Kiehl, K. A. (2011). Disparities in the moral intuitions of  
487 criminal offenders: The role of psychopathy. *J Res Pers*, 45(3), 322-327.  
488 doi:10.1016/j.jrp.2011.02.005
- 489 Augustine, J. R. (1985). The insular lobe in primates including humans. *Neurological*  
490 *Research*, 7, 2-10.
- 491 Augustine, J. R. (1996). Circuitry and functional aspects of the insular lobe in  
492 primates including humans. *Brain Research Reviews*, 22, 229-244.
- 493 Babaev, O., Chatain, C. P., & Krueger-Burg, D. (2018). Inhibition in the amygdala  
494 anxiety circuitry. *Experimental & Molecular Medicine*, 50(18).  
495 doi:10.1038/s12276-018-0063-8
- 496 Baur, V., Hänggi, J., Langer, N., & Jäncke, L. (2013). Resting-state functional and  
497 structural connectivity within an insula-amygdala route specifically index  
498 state and trait anxiety. *Society of Biological Psychiatry*, 73, 85-92.  
499 doi:10.1016/j.biopsych.2012.06.003
- 500 Beaver, K. M., Boutwell, B. B., Barnes, J. C., Vaughn, M. G., & DeLisi, M. (2017). The  
501 Association Between Psychopathic Personality Traits and Criminal Justice  
502 Outcomes: Results From a Nationally Representative Sample of Males and  
503 Females. *Crime & Delinquency*, 63(6), 708 -730.  
504 doi:10.1177/0011128715573617
- 505 Bebkoa, G., Bertocci, M., Chase, H., Dwojak, A., Bonar, L., Almeida, J., . . . Phillips, M.  
506 L. (2015). Decreased amygdala-insula resting state connectivity in  
507 behaviorally and emotionally dysregulated youth. *Psychiatry Research:*  
508 *Neuroimaging*, 231(1), 77-86. doi:10.1016/j.psychresns.2014.10.015
- 509 Blair, R. J. R. (2007). The amygdala and ventromedial prefrontal cortex in morality and  
510 psychopathy. *Trends in Cognitive Sciences*, 11(9).  
511 doi:10.1016/j.tics.2007.07.003
- 512 Blair, R. J. R. (2013). Psychopathy: cognitive and neural dysfunction. *Dialogues in*  
513 *Clinical Neuroscience*, 15(2), 181. doi:10.31887/DCNS.2013.15.2/rblair
- 514 Bowu, J. C., Kent, J., Koff, E., Martin, C., & Alpert, M. (1988). Facial asymmetry while  
515 posing positive and negative emotions: Support for the right hemisphere
-

- 516 hypothesis. *Neuropsychologia*, 26(5), 759-764. doi:10.1016/0028-  
517 3932(88)90013-9
- 518 Brennan, G. M., Crowley, M. J., Wu, J., Mayes, L. C., & Baskin-Sommers, A. R. (2018).  
519 Neural processing of social exclusion in individuals with psychopathic traits:  
520 Links to anger and aggression. *Psychiatry Res*, 268, 263-271.  
521 doi:10.1016/j.psychres.2018.07.024
- 522 Calder, A. J., Lawrence, A. D., & Young, A. W. (2001). Neuropsychology of fear and  
523 loathing. *Neuroscience*, 2(5), 352-363. doi:10.1038/35072584
- 524 Clifford, S., Iyengar, V., Cabeza, R., & Sinnott-Armstrong, W. (2015). Moral  
525 foundations vignettes: a standardized stimulus database of scenarios based  
526 on moral foundations theory. *Behav Res*, 47, 1178-1198. doi:10.3758/s13428-  
527 014-0551-2
- 528 Contreras-Rodriguez, O., Pujol, J., Batalla, I., Harrison, B. J., Soriano-Mas, C., Deus, J., .  
529 . . Cardoner, N. (2014). Functional Connectivity Bias in the Prefrontal Cortex of  
530 Psychopaths. *Biol Psychiatry*, 78(9), 647-655.  
531 doi:10.1016/j.biopsych.2014.03.007
- 532 Corr, P. J. (2010). The psychoticism–psychopathy continuum: A neuropsychological  
533 model of core deficits. *Personality and Individual Differences*, 48(6), 695-703.  
534 doi:10.1016/j.paid.2009.12.023
- 535 Craig, A., D., & Craig, A., D. (2009). How do you feel — now? The anterior insula and  
536 human awareness. *Nature Reviews Neuroscience*, 10(1). doi:10.1038/nrn2555
- 537 Deming, P., & Koenigs, M. (2020). Functional neural correlates of psychopathy: a  
538 meta-analysis of MRI data. *Transl Psychiatry*, 10(1), 133. doi:10.1038/s41398-  
539 020-0816-8
- 540 Dennis, E. L., Gotlib, I. H., Thompson, P. M., & Thomason, M. E. (2011). Anxiety  
541 modulates insula recruitment in resting-state functional magnetic resonance  
542 imaging in youth and adults. *Brain Connectivity*, 1(3), 245-254.  
543 doi:10.1089/brain.2011.0030
- 544 Diano, M., Tamietto, M., Celeghein, A., Weiskrantz, L., Tatu, M.-K., Bagnis, A., . . .  
545 Costa, T. (2017). Dynamic changes in amygdala psychophysiological  
546 connectivity reveal distinct neural networks for facial expressions of basic
-



- 547 emotions. *Scientific reports*, 7(1), 1-13. doi:10.1038/srep45260
- 548 Djeriouat, H., & Trémolière, B. (2014). The Dark Triad of personality and utilitarian  
549 moral judgment: The mediating role of Honesty/Humility and Harm/Care.  
550 *Personality and Individual Differences*, 67, 11-16.  
551 doi:10.1016/j.paid.2013.12.026
- 552 Dolan, M. C., & Fullam, R. S. (2009). Psychopathy and functional magnetic resonance  
553 imaging blood oxygenation level-dependent responses to emotional faces in  
554 violent patients with schizophrenia. *Biological Psychiatry*, 66(6), 570-577.  
555 doi:10.1016/j.biopsych.2009.03.019
- 556 Du, J. (2019). Validation of the Moral Foundations Questionnaire with three Chinese  
557 ethnic groups. *Social Behavior and Personality: an international journal*, 47(8),  
558 1-12. doi:10.2224/sbp.8009
- 559 Ermer, E., Cope, L. M., Nyalakanti, P. K., Calhoun, V. D., & Kiehl, K. A. (2012). Aberrant  
560 paralimbic gray matter in criminal psychopathy. *Journal of Abnormal  
561 Psychology*, 121(3), 649–658. doi:10.1037/a0026371
- 562 Espinoza, F. A., Anderson, N. E., Vergara, V. M., Harenski, C. L., Decety, J., Rachakonda,  
563 S., . . . Kiehl, K. A. (2019). Resting-state fMRI dynamic functional network  
564 connectivity and associations with psychopathy traits. *NeuroImage: Clinical*,  
565 24, 101970. doi:10.1016/j.nicl.2019.101970
- 566 Fernandes, S., Aharoni, E., Harenski, C. L., Caldwell, M., & Kiehl, K. A. (2020).  
567 Anomalous moral intuitions in juvenile offenders with psychopathic traits.  
568 *Journal of Research in Personality*. doi:10.1016/j.jrp.2020.103962
- 569 Fox, M. D., & Greicius, M. (2010). Clinical applications of resting state functional  
570 connectivity. *Frontiers in Systems Neuroscience* 4(19).  
571 doi:10.3389/fnsys.2010.00019
- 572 Friston, K., & Moran, R. (2013). Analysing connectivity with Granger causality and  
573 dynamic causal modelling. *Current Opinion in Neurobiology*, 23, 172–178  
574 doi:org/10.1016/j.conb.2012.11.010
- 575 Fumagalli, M., & Priori, A. (2012). Functional and clinical neuroanatomy of morality.  
576 *Brain*, 135(7), 2006-2021. doi:10.1093/brain/awr334
- 577 Gainotti, G. (2019). Emotions and the Right Hemisphere: Can new data clarify old
-

- 578 models? *The Neuroscientist*, 25(3), 258-270. doi:10.1177/10738584187853
- 579 Gao, Y., & Tang, S. (2013). Psychopathic personality and utilitarian moral judgment in  
580 college students. *Journal of Criminal Justice*, 41, 342-349.  
581 doi:10.1016/j.jcrimjus.2013.06.012
- 582 Gasquoine, P. G. (2014). Contributions of the Insula to Cognition and Emotion.  
583 *Neuropsychol Review*. doi:10.1007/s11065-014-9246-9
- 584 Gay, J. G., Vitacco, M. J., Hackney, A., Beussink, C., & Lilienfeld, S. O. (2018). Relations  
585 among psychopathy, moral competence, and moral intuitions in student and  
586 community samples. *Legal and Criminological Psychology*, 23(2), 117-134.  
587 doi:10.1111/lcrp.12128
- 588 Geng, H., Li, X., Chen, J., Li, X., & Gu, R. (2016). Decreased Intra-and Inter-Saliency  
589 Network Functional Connectivity is Related to Trait Anxiety in Adolescents.  
590 *Frontiers in Behavioral Neuroscience*, 9(350). doi:10.3389/fnbeh.2015.00350
- 591 Glenn, A. L., Iyer, R., Graham, J., Koleva, S., & Haidt, J. (2009a). Are all types of  
592 morality compromised in psychopathy? *J Pers Disord*, 23(4), 384-398.  
593 doi:10.1521/pedi.2009.23.4.384
- 594 Glenn, A. L., Raine, A., & Schug, R. A. (2009b). The neural correlates of moral  
595 decision-making in psychopathy. *Mol Psychiatry*, 14(1), 5-6.  
596 doi:10.1038/mp.2008.104
- 597 Graham, J., Haidt, J., Motyl, M., Meindl, P., Iskiwitch, C., & Mooijman, M. (2018).  
598 *Moral Foundations Theory: On the advantages of moral pluralism over moral*  
599 *monism*: The Guilford Press.
- 600 Graham, J., Haidt, J., & Nosek, B. A. (2009). Liberals and conservatives rely on  
601 different sets of moral foundations. *Journal of personality social psychology*,  
602 96(5), 1029. doi:10.1037/a0015141
- 603 Haidt, J. (2012). *The righteous mind: Why good people are divided by politics and*  
604 *religion*. New York, NY: Vintage Books.
- 605 Haidt, J., & Graham, J. (2007). When Morality Opposes Justice: Conservatives Have  
606 Moral Intuitions that Liberals may not Recognize. *Social Justice Research*, 20,  
607 98-166. doi:10.1007/s11211-007-0034-z
- 608 Haidt, J., & Joseph, C. (2004). Intuitive ethics: How innately prepared intuitions
-

- 609 generate culturally variable virtues. *American Academy of Arts & Sciences*,  
610 133(4). doi:10.2307/20027945
- 611 Han, H., Chen, J., Jeong, C., & Glover, G. H. (2016). Influence of the Cortical Midline  
612 Structures on Moral Emotion and Motivation in Moral Decision-Making  
613 *Behavioural Brain Research*, 302, 237-251. doi:10.1016/j.bbr.2016.01.001
- 614 Hare, R. D. (1991). Manual for the Hare Psychopathy Checklist-Revised. *Toronto, ON:*  
615 *Multi-Health Systems*.
- 616 Hare, R. D. (2003). The Hare Psychopathy Checklist-Revised (2nd ed.). *Toronto, ON:*  
617 *Multi-Health Systems*.
- 618 Harenskia, C. L., Harenskia, K. A., & Kiehla, K. A. (2014). Neural processing of moral  
619 violations among incarcerated adolescents with psychopathic traits. *Dev Cogn*  
620 *Neurosci*, 10, 181-189. doi:10.1016/j.dcn.2014.09.002
- 621 Hofmann, D., & Straube, T. (2019). Resting-state fMRI effective connectivity between  
622 the bed nucleus of the stria terminalis and amygdala nuclei. *Hum Brain Mapp*,  
623 40, 2723–2735. doi:10.1002/hbm.24555
- 624 Killgore, W. D. S., & Yurgelun-Todd, D. A. (2007). The right-hemisphere and valence  
625 hypotheses: could they both be right (and sometimes left)? *Social cognitive*  
626 *and affective neuroscience*, 2(3), 240-250. doi:10.1093/scan/nsm020
- 627 Lee, Z., & Salekin, R. T. (2010). Psychopathy in a Noninstitutional Sample: Differences  
628 in Primary and Secondary Subtypes. *Personality Disorders: Theory, Research,*  
629 *and Treatment*, 1(3), 153–169. doi:10.1037/a0019269
- 630 Levenson, M. R., Kiehl, K. A., & Fitzpatrick, C. M. (1995). Assessing psychopathic  
631 attributes in a noninstitutionalized population. *Journal of personality and*  
632 *social psychology*, 68(1), 151. doi:10.1037/0022-3514.68.1.151
- 633 Liao, W., Qiu, C., Gentili, C., Walter, M., Pan, Z., Ding, J., . . . Chen, H. (2010 ). Altered  
634 Effective Connectivity Network of the Amygdala in Social Anxiety Disorder: A  
635 Resting-State fMRI Study. *PloS one*, 5(12), e15238.  
636 doi:10.1371/journal.pone.0015238
- 637 Loukas, M., Pennell, C., Groat, C., Tubbs, R. S., & Cohen-Gadol, A. A. (2011). Korbinian  
638 Brodmann (1868-1918) and His Contributions to Mapping the Cerebral  
639 Cortex. *Neurosurgery*, 68, 6–11. doi:10.1227/NEU.0b013e3181fc5cac
-

- 640 Lynam, D. R., Whiteside, S., & Jones, S. J. J. o. p. a. (1999). Self-reported psychopathy:  
641 A validation study. *73*(1), 110-132.
- 642 Marsh, A. A., Finger, E. C., Fowler, K. A., Jurkowitz, I. T. N., Schechter, J. C., Yu, H. H., . .  
643 . Blair, R. J. R. (2011). Reduced amygdala–orbitofrontal connectivity during  
644 moral judgments in youths with disruptive behavior disorders and  
645 psychopathic traits. *Psychiatry Research: Neuroimaging*, *194*, 279–286.  
646 doi:10.1016/j.pscychresns.2011.07.008
- 647 Marsh, A. A., Finger, E. C., Schechter, J. C., Jurkowitz, I. T., Reid, M. E., & Blair, R. J.  
648 (2011). Adolescents with psychopathic traits report reductions in  
649 physiological responses to fear. *Journal of Child Psychology and Psychiatry*,  
650 *52*(8), 834-841. doi:10.1111/j.1469-7610.2010.02353.x
- 651 Marshall, J., Watts, A. L., & Lilienfeld, S. O. (2018). Do psychopathic individuals  
652 possess a misaligned moral compass? A meta-analytic examination of  
653 psychopathy's relations with moral judgment. *Personal Disord*, *9*(1), 40-50.  
654 doi:10.1037/per0000226
- 655 Menon, V., & Uddin, L. Q. (2010). Saliency, switching, attention and control: a  
656 network model of insula function. *Brain Struct Funct*, *214*, 655–667.  
657 doi:10.1007/s00429-010-0262-0
- 658 Motzkin, J. C., Newman, J. P., Kiehl, K. A., & Koenigs, M. (2011). Reduced prefrontal  
659 connectivity in psychopathy. *J Neurosci*, *31*(48), 17348-17357.  
660 doi:10.1523/JNEUROSCI.4215-11.2011
- 661 Neumann, C. S., & Hare, R. D. (2008). Psychopathic traits in a large community  
662 sample: links to violence, alcohol use, and intelligence. *J Consult Clin Psychol*,  
663 *76*(5), 893-899. doi:10.1037/0022-006X.76.5.893
- 664 Patil, I. (2015). Trait psychopathy and utilitarian moral judgement: The mediating role  
665 of action aversion. *Journal of Cognitive Psychology*, *27*(3), 349-366.  
666 doi:10.1080/20445911.2015.1004334
- 667 Philippi, C. L., Pujara, M. S., Motzkin, J. C., Newman, J., Kiehl, K. A., & Koenigs, M.  
668 (2015). Altered Resting-State Functional Connectivity in Cortical Networks in  
669 Psychopathy. *The Journal of Neuroscience*, *35*(15), 6068 – 6078.  
670 doi:10.1523/JNEUROSCI.5010-14.2015
-

- 671 Phillips, M. L., Drevets, W. C., Rauch, S. L., & Lane, R. (2003). Neurobiology of  
672 Emotion Perception I: The Neural Basis of Normal Emotion Perception.  
673 *Society of Biological Psychiatry*, 54, 504-514. doi:10.1016/S0006-  
674 3223(03)00168-9
- 675 Q. Uddin, L. (2014). Salience processing and insular cortical function and dysfunction.  
676 *Nature Reviews Neuroscience*. doi:10.1038/nrn3857
- 677 Rajan, A., Meyyappan, S., Walker, H., Samuel, I. B. H., Hu, Z., & Ding, M. (2019).  
678 Neural mechanisms of internal distraction suppression in visual attention.  
679 *Cortex*, 117, 77-88. doi:10.1016/j.cortex.2019.02.026
- 680 Ridderinkhof, K. R., Ullsperger, M., Crone, E. A., & Nieuwenhuis, S. (2004). The Role of  
681 the Medial Frontal Cortex in Cognitive Control. *Science*, 306(5695), 443-447.  
682 doi:10.1126/science.1100301
- 683 Roebroeck, A., Formisano, E., & Goebel, R. (2005). Mapping directed influence over  
684 the brain using Granger causality and fMRI. *Neuroimage*, 25(1), 230-242.  
685 doi:10.1016/j.neuroimage.2004.11.017
- 686 Santana, E. J. (2016). The brain of the psychopath: A systematic review of structural  
687 neuroimaging studies. *Psychology & Neuroscience*, 9(4), 420-443.  
688 doi:10.1037/pne0000069
- 689 Schein, C., & Gray, K. (2017). The Theory of Dyadic Morality: Reinventing Moral  
690 Judgment by Redefining Harm. *Personality and Social Psychology Review*, 1–  
691 39. doi:10.1177/1088868317698288
- 692 Seth, A. K., Barrett, A. B., & Barnett, L. (2015). Granger Causality Analysis in  
693 Neuroscience and Neuroimaging. *The Journal of Neuroscience*, 35(8), 3293–  
694 3297. doi:10.1523/JNEUROSCI.4399-14.2015
- 695 Sethi, A., McCrory, E., Puetz, V., Hoffmann, F., Knodt, A. R., Radtke, S. R., . . . Viding, E.  
696 (2018). 'Primary' and 'secondary' variants of psychopathy in a volunteer  
697 sample are associated with different neurocognitive mechanisms *Biological*  
698 *Psychiatry: Cognitive Neuroscience and Neuroimaging*, 3(12), 1013-1021.  
699 doi:10.1016/j.bpsc.2018.04.002
- 700 Shenhav, A., & Greene, J. D. (2014). Integrative Moral Judgment: Dissociating the  
701 Roles of the Amygdala and Ventromedial Prefrontal Cortex. *The Journal of*
-

- 702           *Neuroscience*, 34(13), 4741– 4749. doi:10.1523/JNEUROSCI.3390-13.2014
- 703 Skeem, J., Johansson, P., Andershed, H., Kerr, M., & Louden, J. E. (2007). Two  
704           Subtypes of Psychopathic Violent Offenders That Parallel Primary and  
705           Secondary Variants. *Journal of Abnormal Psychology*, 116(2), 395– 409.  
706           doi:10.1037/0021-843X.116.2.395
- 707 Song, X.-W., Dong, Z.-Y., Long, X.-Y., Li, S.-F., Zuo, X.-N., Zhu, C.-Z., . . . Zang, Y.-F.  
708           (2011). REST: a toolkit for resting-state functional magnetic resonance  
709           imaging data processing. *PloS one*, 6(9), e25031.  
710           doi:10.1371/journal.pone.0025031
- 711 Stein, J. L., Wiedholz, L. M., Bassett, D. S., Weinberger, D. R., Zink, C. F., Mattay, V. S.,  
712           & Meyer-Lindenberg, A. (2007). A validated network of effective amygdala  
713           connectivity. *NeuroImage*, 36, 736–745.  
714           doi:10.1016/j.neuroimage.2007.03.022
- 715 Stein, M. B., Simmons, A. N., Feinstein, J. S., & Paulus, M. P. (2007). Increased  
716           Amygdala and Insula Activation During Emotion Processing in Anxiety-Prone  
717           Subjects. *American Journal of Psychiatry*, 164(2), 318–327.  
718           doi:10.1176/ajp.2007.164.2.318
- 719 Straube, T., & Miltner, W. H. R. (2011). Attention to aversive emotion and specific  
720           activation of the right insula and right somatosensory cortex. *NeuroImage*,  
721           54(3), 2534–2538. doi:10.1016/j.neuroimage.2010.10.010
- 722 Takamatsu, R., & Takai, J. (2019). With or Without Empathy: Primary Psychopathy  
723           and Difficulty in Identifying Feelings Predict Utilitarian Judgment in Sacrificial  
724           Dilemmas. *Ethics & Behavior*, 29(1), 71-85.  
725           doi:10.1080/10508422.2017.1367684
- 726 Vaillancourt, T., & Brittain, H. (2019). Longitudinal Associations Among Primary and  
727           Secondary Psychopathic Traits, Anxiety, and Borderline Personality Disorder  
728           Features Across Adolescence. *Personality Disorders: Theory, Research, and*  
729           *Treatment*, 10(4), 354–364. doi:10.1037/per0000325
- 730 Venkatraman, V., Rosati, A. G., Taren, A. A., & Huettel, S. A. (2009). Resolving  
731           Response, Decision, and Strategic Control: Evidence for a Functional  
732           Topography in Dorsomedial Prefrontal Cortex. *The Journal of Neuroscience*,
-

- 733           29(42), 13158–13164. doi:10.1523/JNEUROSCI.2708-09.2009
- 734 Wang, M.-C., Shou, Y., Deng, Q., Sellbom, M., Salekin, R. T., & Gao, Y. (2018). Factor  
735           structure and construct validity of the Levenson Self-Report Psychopathy  
736           Scale (LSRP) in a sample of Chinese male inmates. *Psychological assessment*,  
737           30(7), 882. doi:10.1037/pas0000537
- 738 Wang, R., Yang, Q., Huang, P., Sai, L., & Gong, Y. (2019). The association between  
739           disgust sensitivity and negative attitudes toward homosexuality: the  
740           mediating role of moral foundations. *Frontiers in psychology*, 10, 1229.  
741           doi:10.3389/fpsyg.2019.01229
- 742 Yan, C.-G., Wang, X.-D., Zuo, X.-N., & Zang, Y.-F. (2016). DPABI: data processing &  
743           analysis for (resting-state) brain imaging. *Neuroinformatics*, 14(3), 339-351.  
744           doi:10.1007/s12021-016-9299-4
- 745 Yang, Y., Raine, A., Colletti, P., Toga, A., & Narr, K. (2009). Abnormal temporal and  
746           prefrontal cortical gray matter thinning in psychopaths. *Molecular Psychiatry*,  
747           14, 561–562. doi:10.1038/mp.2009.12
- 748 Ye, S., Yang, Q., Lan, T., Wang, Y., Zhu, B., Dong, Y., & Krueger, F. (2021). Psychopathic  
749           traits predict moral judgments in five moral foundations: The mediating effect  
750           of unpleasantness. *Legal and Criminological Psychology*.  
751           doi:10.1111/lcrp.12189
- 752 Yoder, K., Harenski, C., Kiehl, K., & Decety, J. (2015). Neural networks underlying  
753           implicit and explicit moral evaluations in psychopathy. *Translational  
754           Psychiatry*, 5, e625. doi:10.1038/tp.2015.117
- 755 Yu, H., Li, J., & Zhou, X. (2015). Neural Substrates of Intention–Consequence  
756           Integration and Its Impact on Reactive Punishment in Interpersonal  
757           Transgression. *The Journal of Neuroscience*, 35(12), 4917– 4925.  
758           doi:10.1523/JNEUROSCI.3536-14.2015
- 759 Zang, Z.-X., Yan, C.-G., Dong, Z.-Y., Huang, J., & Zang, Y.-F. (2012). Granger causality  
760           analysis implementation on MATLAB: a graphic user interface toolkit for fMRI  
761           data processing. *Journal of neuroscience methods*, 203(2), 418-426.  
762           doi:10.1016/j.jneumeth.2011.10.006
- 763
-

32

764

765

766

## 767 **Table Legends**

768 **Table 1. Demographic information.**

|                      | Male (N=29) |      | Female (N=41) |      | <i>p</i> -value |
|----------------------|-------------|------|---------------|------|-----------------|
|                      | Mean        | SD   | Mean          | SD   |                 |
| Age (years)          | 23.52       | 2.86 | 22.15         | 2.08 |                 |
| T-PTS                | 52.34       | 7.41 | 53.68         | 7.70 | 0.469           |
| P-PTS                | 32.69       | 5.57 | 33.00         | 5.10 | 0.810           |
| S-PTS                | 19.66       | 3.15 | 20.68         | 3.56 | 0.217           |
| Harm foundation      | 19.10       | 3.93 | 20.49         | 3.24 | 0.112           |
| Fairness foundation  | 19.72       | 4.57 | 20.56         | 3.10 | 0.363           |
| Loyalty foundation   | 18.24       | 3.47 | 20.17         | 3.71 | 0.031*          |
| Authority foundation | 16.21       | 4.72 | 17.68         | 3.54 | 0.139           |
| Purity foundation    | 15.38       | 4.59 | 16.63         | 4.02 | 0.229           |

769 SD: standard deviation; LSRP: the Levenson Self-Report Psychopathy Scale; T-TPS: total  
770 psychopathic traits score; P-PTS: primary psychopathic traits score; S-PTS: secondary  
771 psychopathic traits score.

772 \*:  $p < 0.05$

773

774

775



33

776 **Table 2. Seeds selected to evaluate effective connectivity.**

| Seed regions                    | Hemi. | MNI coordinates |     |     |
|---------------------------------|-------|-----------------|-----|-----|
|                                 |       | x               | y   | z   |
| Anterior cingulate cortex       | L     | -6              | 32  | 22  |
| Dorsomedial prefrontal cortex 1 | L/R   | -2              | 56  | 28  |
| Dorsomedial prefrontal cortex 2 | L/R   | -2              | 50  | 34  |
| Dorsomedial prefrontal cortex 3 | L/R   | 2               | 44  | 32  |
| Inferior frontal gyrus          | R     | 40              | 40  | -8  |
| Posterior orbitofrontal cortex  | R     | 26              | 8   | -16 |
| Amygdala                        | R     | 30              | 4   | -20 |
| Hippocampus 1                   | R     | 24              | -36 | 2   |
| Hippocampus 2                   | R     | 30              | -40 | -4  |
| Calcarine                       | R     | 12              | -70 | 16  |

777 L: left; R: right

778

34

779 **Table 3. Regression coefficients for the T-PTS, P-PTS, S-PTS, and concern with**  
780 **five moral foundations.**

|           | Regression coefficient |           |        |
|-----------|------------------------|-----------|--------|
|           | T-PTS                  | P-PTS     | S-PTS  |
| Harm      | -0.461***              | -0.498*** | -0.258 |
| Fairness  | -0.174                 | -0.243    | -0.011 |
| Loyalty   | -0.072                 | -0.036    | -0.107 |
| Authority | -0.066                 | -0.079    | -0.024 |
| Purity    | -0.226                 | -0.156    | -0.266 |

781 \*\*\* Bonferroni-corrected  $p < 0.001$ ,  $n=15$ ; T-PTS: total psychopathic traits score; P-PTS: primary  
782 psychopathic traits score; S-PTS: secondary psychopathic traits score.

783

784

785

786

787

788

789

790

791

792

**Table 4. The Effective connectivity associated with psychopathic traits and their relationship to moral concern with moral foundations.**

| Seed regions                    | Direction | Brain regions              | MNI coordinate |     |    | Peak Intensity | Cluster Size <sup>a</sup> | <i>r</i> -value |          |         |           |                |
|---------------------------------|-----------|----------------------------|----------------|-----|----|----------------|---------------------------|-----------------|----------|---------|-----------|----------------|
|                                 |           |                            | x              | y   | z  |                |                           | Harm            | Fairness | Loyalty | Authority | Sanctification |
| <b><i>T-PTS</i></b>             |           |                            |                |     |    |                |                           |                 |          |         |           |                |
| Dorsomedial prefrontal cortex 1 | Output    | Middle temporal gyrus      | -57            | -66 | -3 | 0.484          | 47                        | -0.130          | -0.093   | 0.132   | -0.013    | -0.117         |
| Dorsomedial prefrontal cortex 2 | Input     | Posterior cingulate cortex | -3             | -42 | 24 | 0.446          | 28                        | -0.260          | -0.277   | 0.158   | 0.051     | -0.014         |
| Dorsomedial prefrontal cortex 3 | Input     | Posterior cingulate cortex | 6              | -42 | 12 | 0.529          | 144                       | -0.248          | -0.063   | 0.057   | -0.037    | -0.154         |
| Dorsomedial prefrontal cortex 3 | Output    | Precentral gyrus           | 48             | 0   | 45 | 0.538          | 59                        | -0.405*         | -0.178   | -0.136  | -0.075    | -0.261         |
| Amygdala                        | Input     | Posterior insula           | 39             | -9  | 18 | -0.507         | 27                        | 0.414*          | 0.241    | 0.048   | 0.047     | 0.205          |
| <b><i>P-PTS</i></b>             |           |                            |                |     |    |                |                           |                 |          |         |           |                |
| Anterior cingulate cortex       | Output    | Middle temporal gyrus      | -45            | -75 | 15 | 0.447          | 34                        | -0.256          | -0.319   | 0.032   | -0.107    | -0.085         |
| Dorsomedial prefrontal cortex 1 | Output    | Precentral gyrus           | 45             | 0   | 45 | 0.514          | 46                        | -0.239          | -0.229   | -0.001  | 0.100     | -0.121         |
| Dorsomedial prefrontal cortex 2 | Input     | Posterior cingulate cortex | -3             | -45 | 18 | 0.453          | 34                        | -0.160          | -0.190   | 0.173   | 0.030     | 0.023          |
| Dorsomedial prefrontal cortex 3 | Input     | Posterior cingulate cortex | 3              | -45 | 15 | 0.547          | 126                       | -0.258          | -0.075   | 0.050   | -0.049    | -0.152         |
| Dorsomedial prefrontal cortex 3 | Output    | Inferior parietal lobe     | 39             | -42 | 57 | 0.496          | 37                        | -0.188          | -0.044   | -0.091  | -0.233    | -0.179         |
| Dorsomedial prefrontal cortex 3 | Output    | Precentral gyrus           | 48             | 0   | 45 | 0.583          | 84                        | -0.375          | -0.221   | -0.153  | -0.055    | -0.262         |
| Amygdala                        | Input     | Posterior insula           | 39             | -9  | 21 | -0.542         | 78                        | 0.451*          | 0.225    | 0.036   | 0.090     | 0.230          |
| Amygdala                        | Input     | Supramarginal gyrus        | 60             | -42 | 39 | 0.498          | 27                        | -0.395*         | -0.137   | 0.131   | -0.149    | -0.163         |

a: Number of voxels. FWE ( $p < 0.05$ ) with voxel- $p < 0.001$ . Voxel size =  $3 \times 3 \times 3$ .

T-PTS: total psychopathic traits score; P-PTS: primary psychopathic traits score.

\*: Bonferroni-corrected  $p < 0.05$ ,  $n = 65$ .

36

## Figure Legends

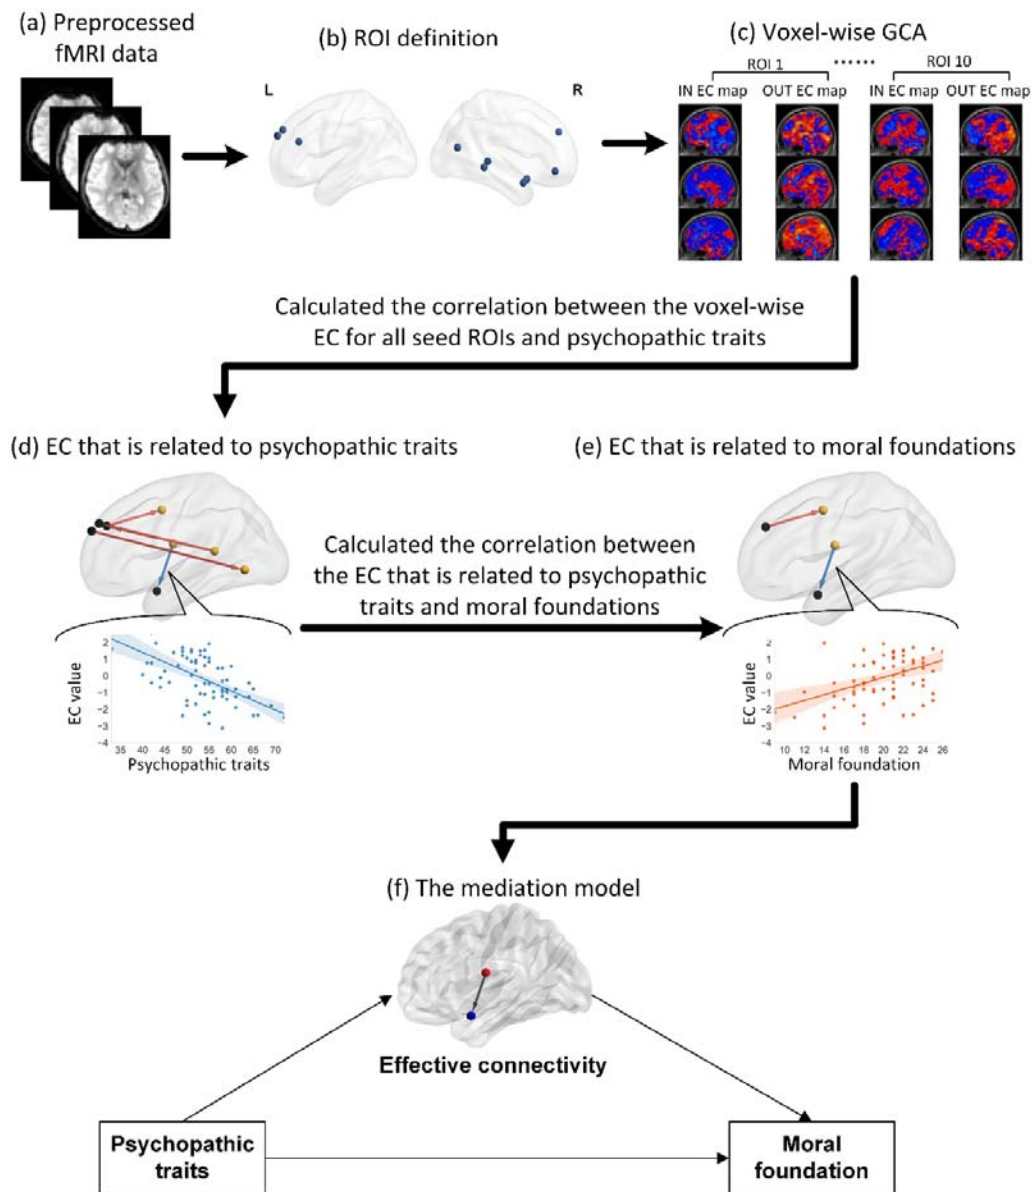

**Figure 1. Workflow of the neuroimaging data analyses.** First, preprocessed rs-fMRI data were used to calculate voxel-wise EC based on ten predefined ROIs (subplot a, b, and c). Then, partial correlation analyses were performed between EC and scores on psychopathic traits (i.e. T-PTS, P-PTS, and S-PTS) (subplot d). Next, partial correlation analyses were performed between EC that is significantly related to psychopathic traits and concerns with moral foundations (subplot e). Finally, mediation analyses were conducted to examine the mediation role of these EC in the relationship between psychopathic traits and concern with moral foundations (subplot f). T-PTS: total psychopathic traits score; P-PTS: primary psychopathic traits score; S-

37

PTS: secondary psychopathic traits score.

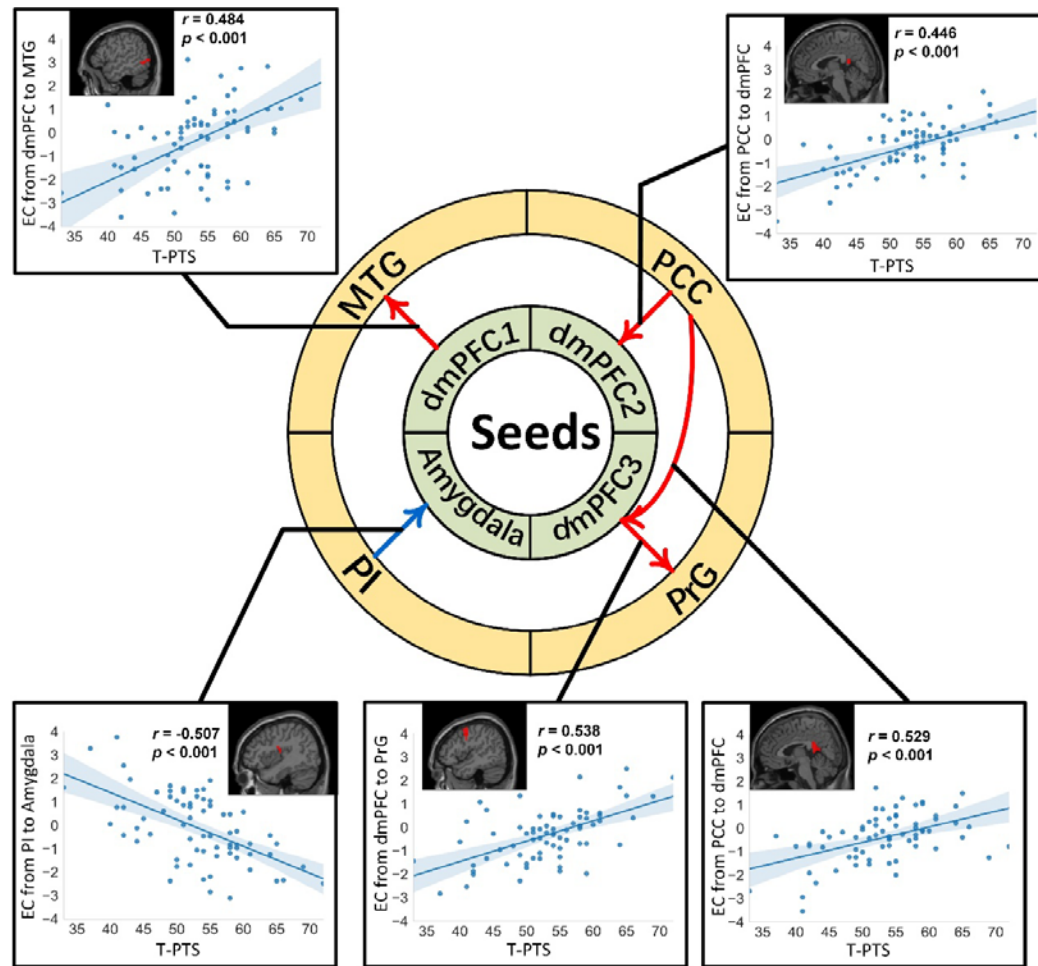

**Figure 2. EC that is significantly related to T-PTS.**

By conducting partial correlation analyses, the EC from the dmPFC to the MTG and PrG, from the PCC to the dmPFC, and from the PI to the amygdala were found to be significantly related to T-PTS. The red arrow refers to a positive association between EC and T-PTS while the blue arrow refers to a negative association between EC and T-PTS. EC: effective connectivity; MTG: middle temporal gyrus; PCC: posterior cingulate cortex; PrG: precentral gyrus; PI: posterior insula; dmPFC: dorsomedial prefrontal cortex; T-PTS: total psychopathic traits score.

38

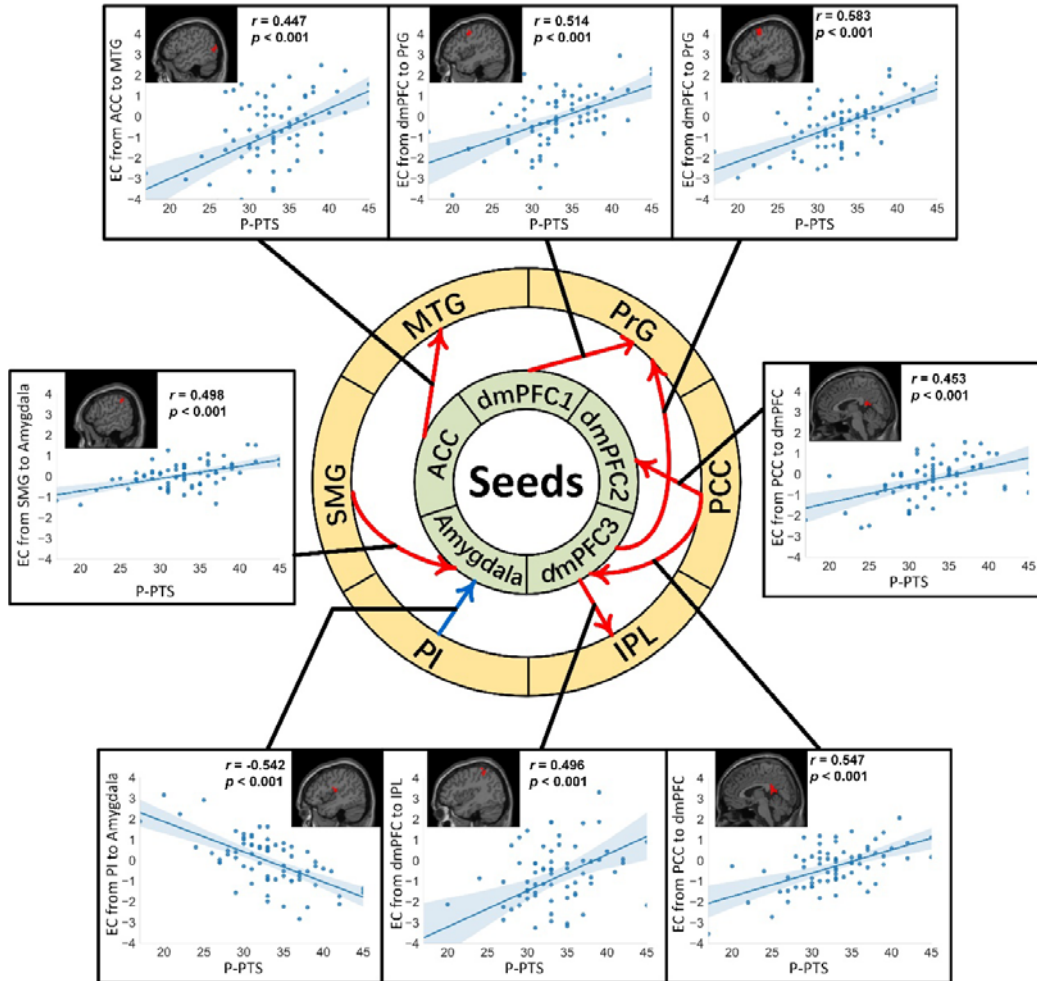

**Figure 3. EC that is significantly related to P-PTS.**

By conducting partial correlation analyses, EC from the ACC to the MTG, from the dmPFC to the PrG and IPL, from the PCC to the dmPFC, and from the PI and SMG to the amygdala were found to be significantly related to P-PTS. The red arrow refers to a positive association between EC and P-PTS while the blue arrow refers to a negative association between EC and P-PTS. EC: effective connectivity; MTG: middle temporal gyrus; PCC: posterior cingulate cortex; PrG: precentral gyrus; PI: posterior insula; IPL: inferior parietal lobe; SMG: supramarginal cortex; ACC: anterior cingulate cortex; dmPFC: dorsomedial prefrontal cortex; P-PTS: primary psychopathic traits score.

39

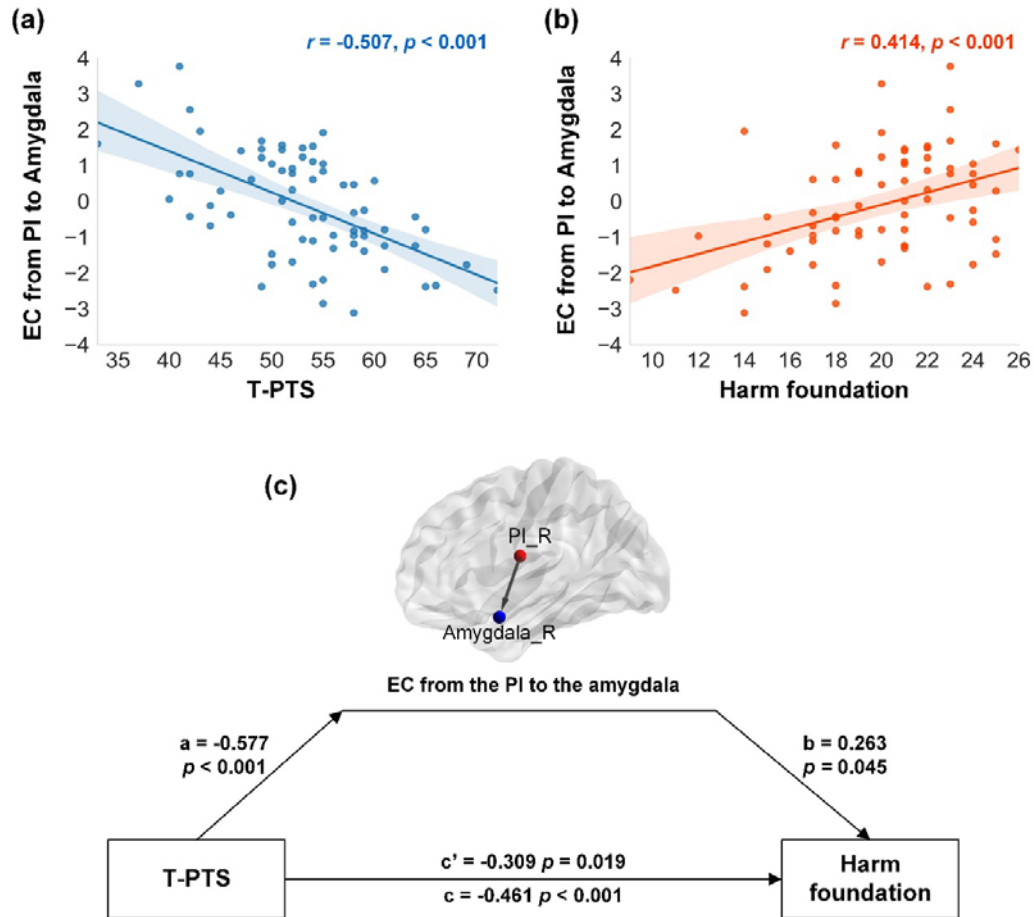

**Figure 4. Correlation and mediation analyses (T-PTS).**

(a) EC from the insula to the amygdala was negatively correlated with T-PTS. (b) EC from the posterior insula to the amygdala was positively associated with moral concern with the Harm foundation. (c) EC from the insula to the amygdala partially mediated the association between T-PTS and moral concern with the Harm foundation. EC: effective connectivity; PI: posterior insula; PI\_R: right posterior insula; Amygdala\_R: right amygdala; T-PTS: total psychopathic traits score.

40

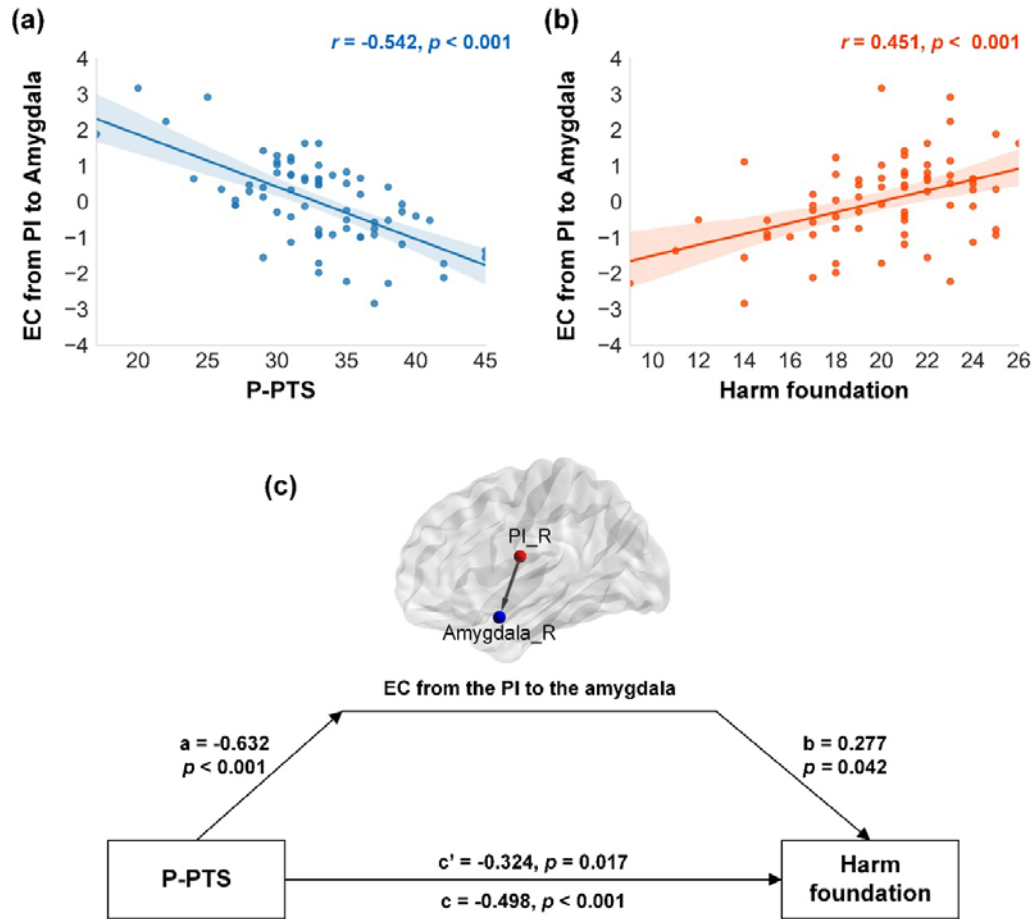

**Figure 5. Correlation and mediation analyses (P-PTS).**

(a) EC from the insula to the amygdala was negatively correlated with P-PTS. (b) EC from the insula to the amygdala was positively associated with concern with the Harm foundation. (c) EC from the insula to the amygdala partially mediated the association between P-PTS and concern with the Harm foundation. EC: effective connectivity; PI: posterior insula; PI\_R: right posterior insula; Amygdala\_R: right amygdala; P-PTS: primary psychopathic traits score.



(a) Preprocessed fMRI data

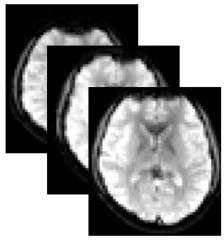

(b) ROI definition

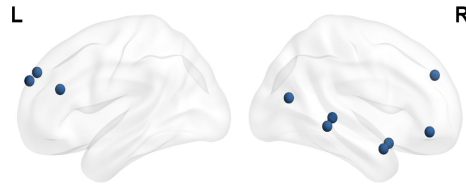

(c) Voxel-wise GCA

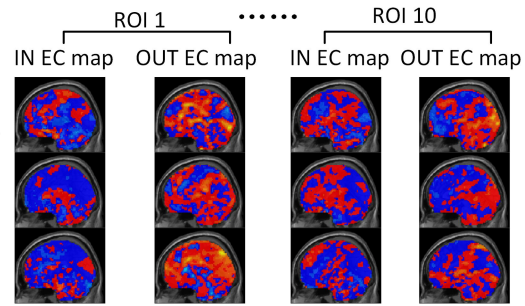

Calculated the correlation between the voxel-wise EC for all seed ROIs and psychopathic traits

(d) EC that is related to psychopathic traits

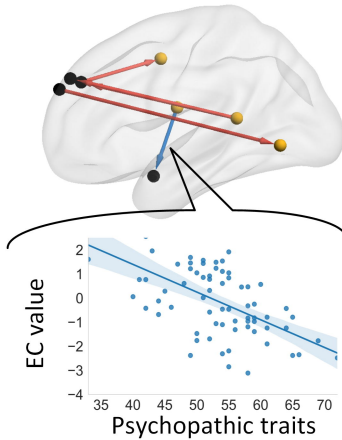

(e) EC that is related to moral foundations

Calculated the correlation between the EC that is related to psychopathic traits and moral foundations

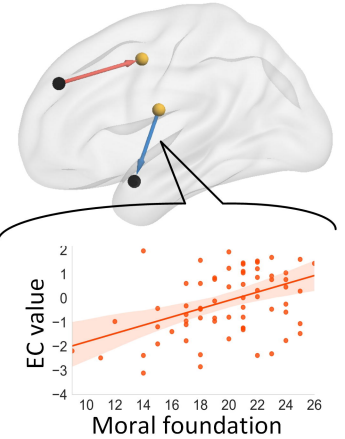

(f) The mediation model

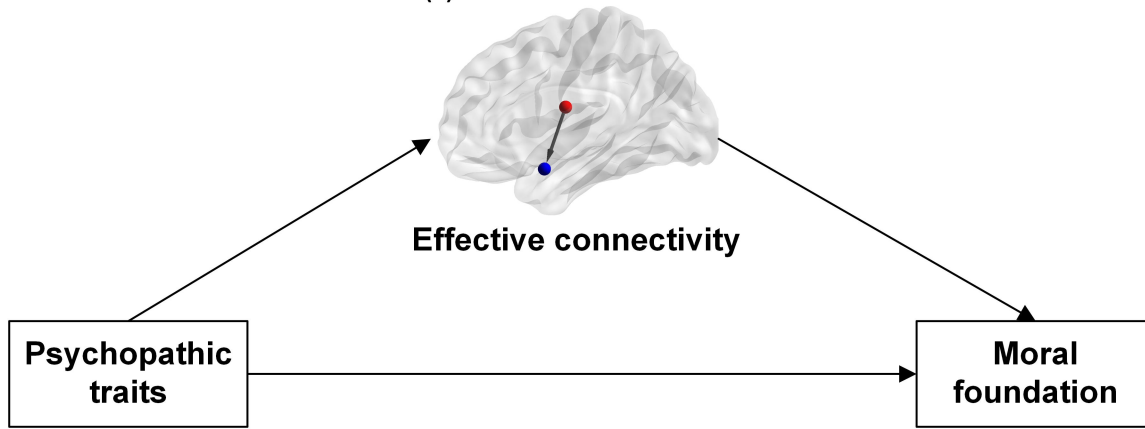

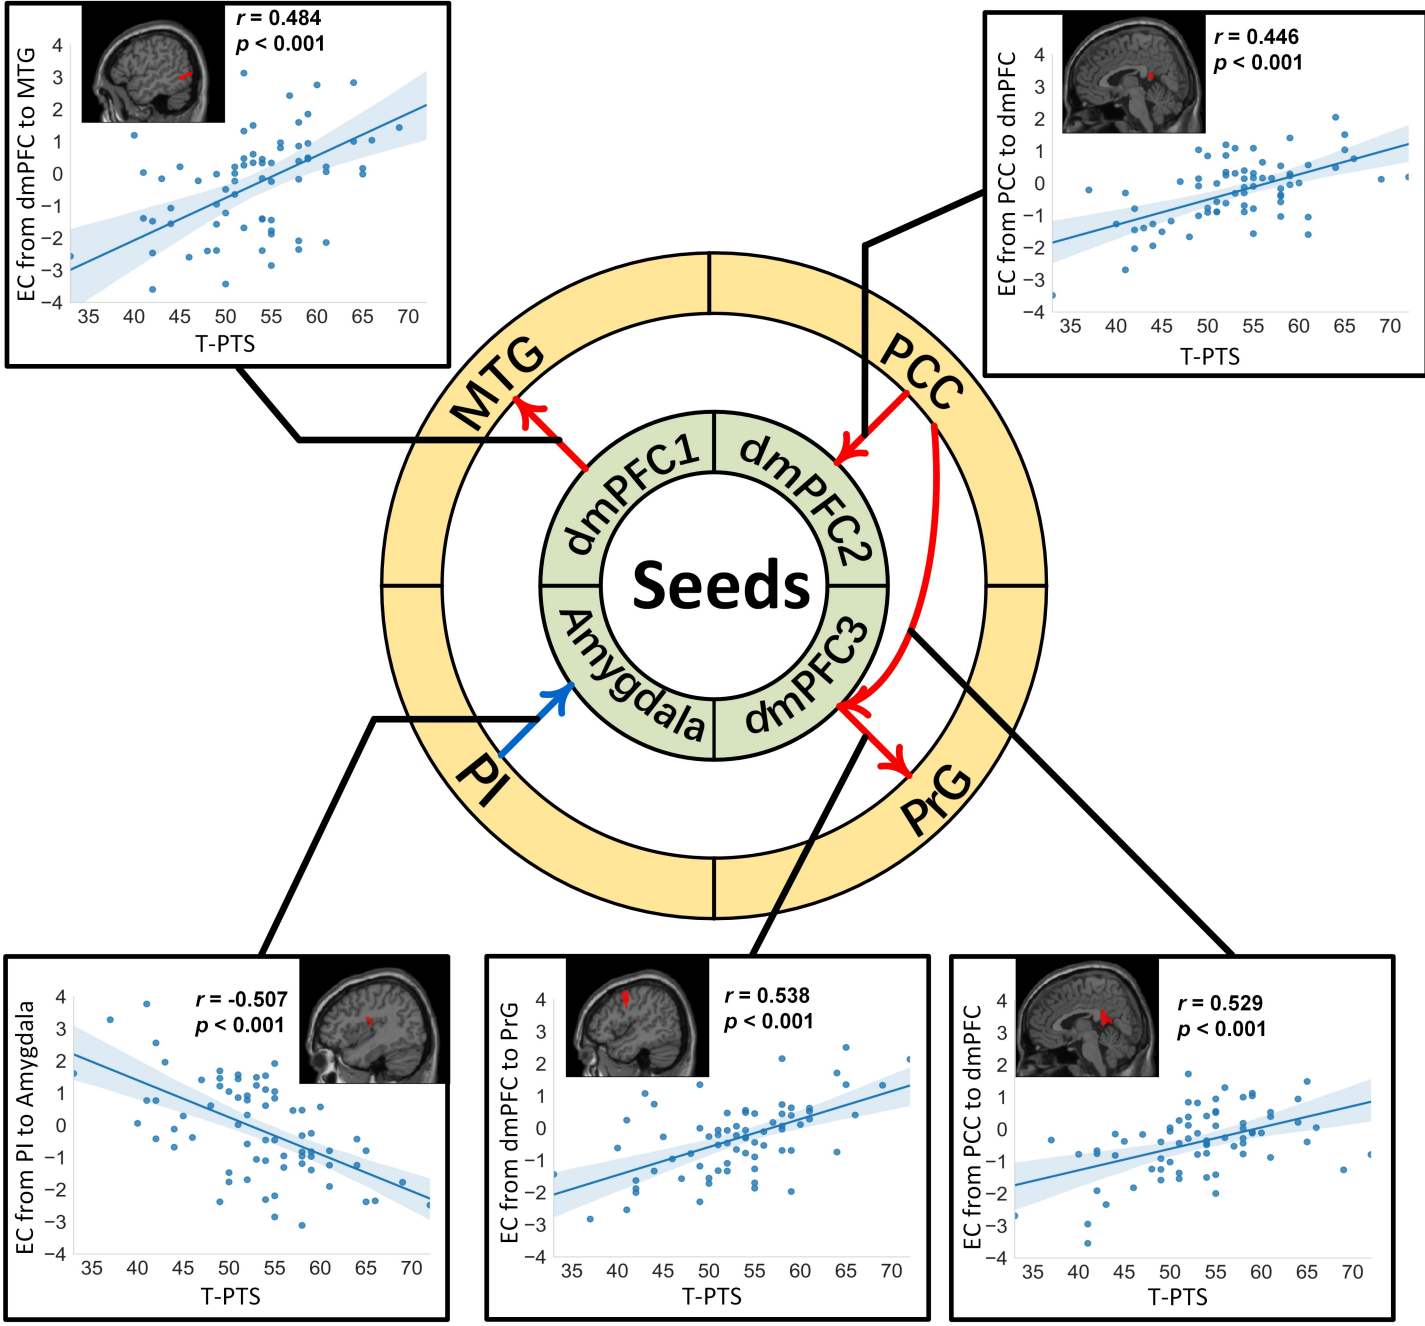

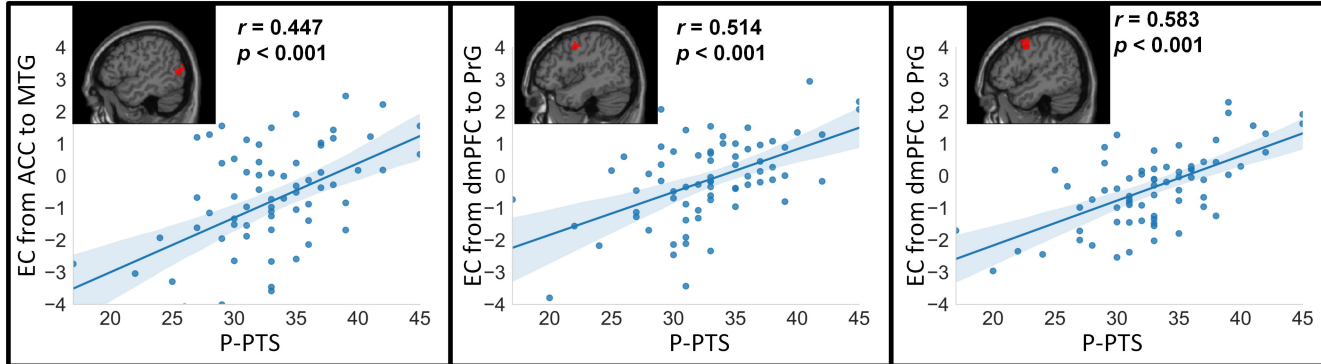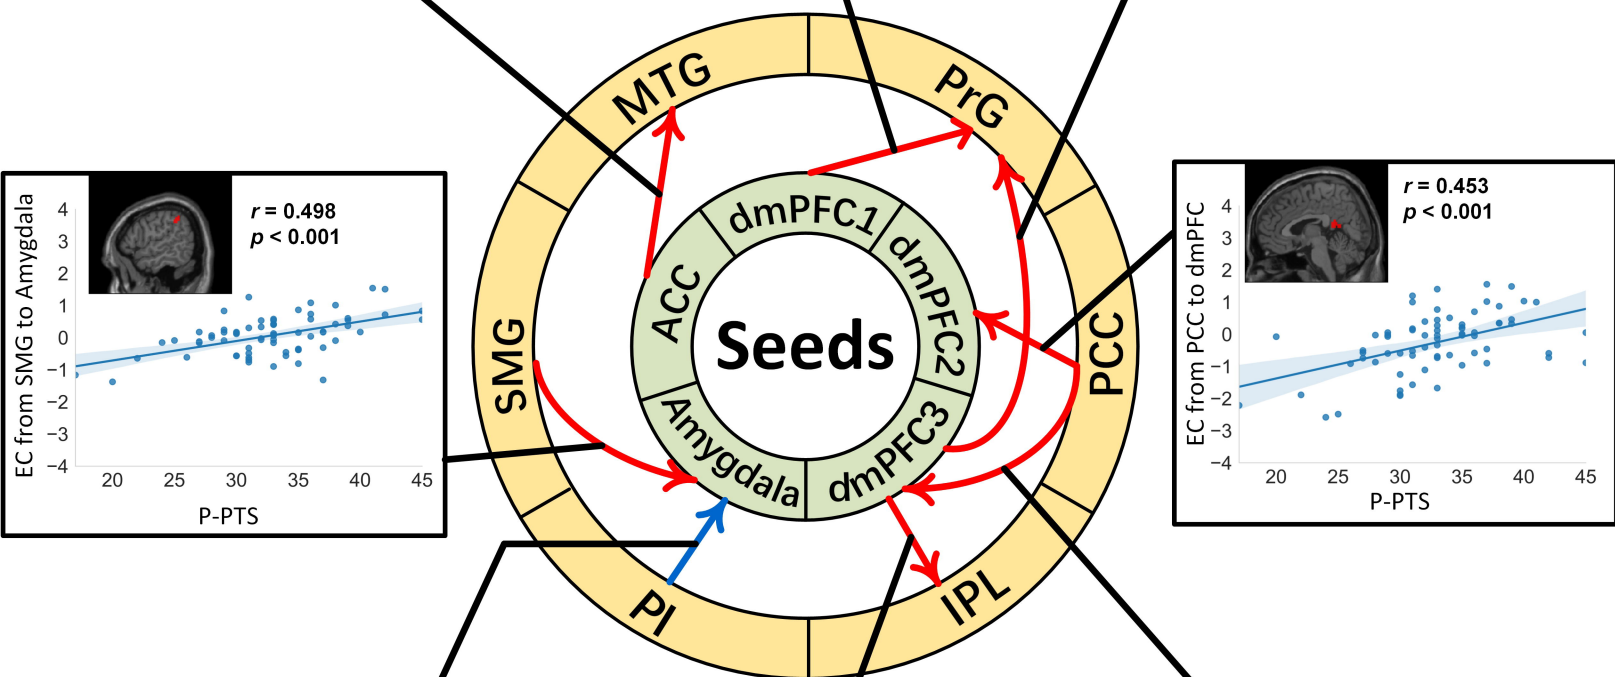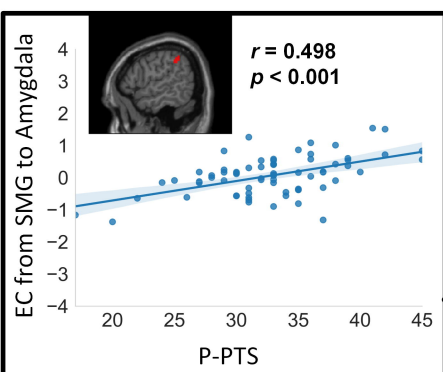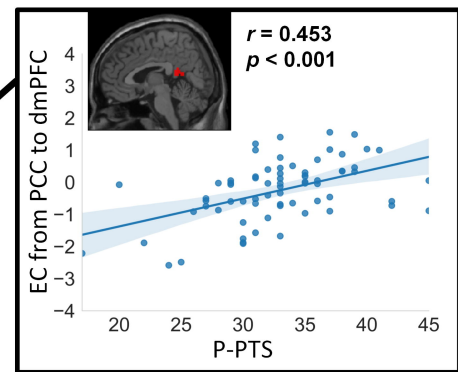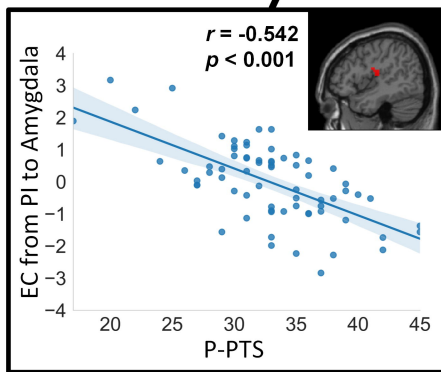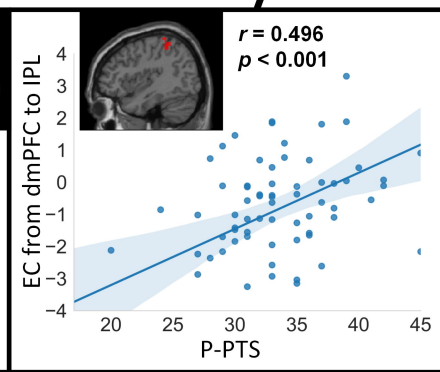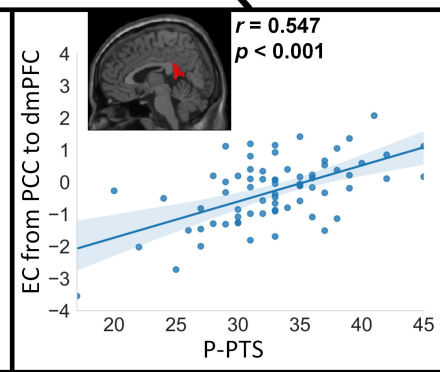

**(a)**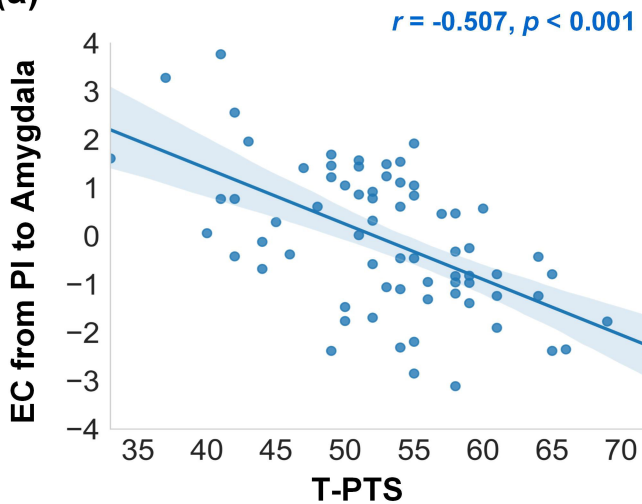**(b)**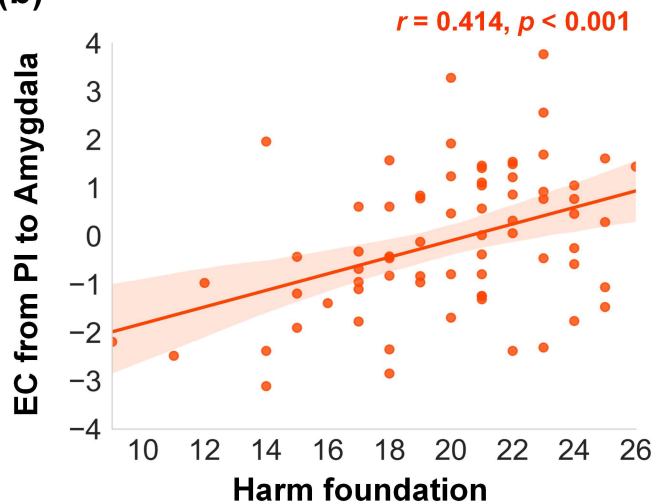**(c)**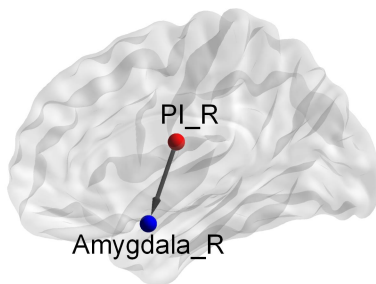

EC from the PI to the amygdala

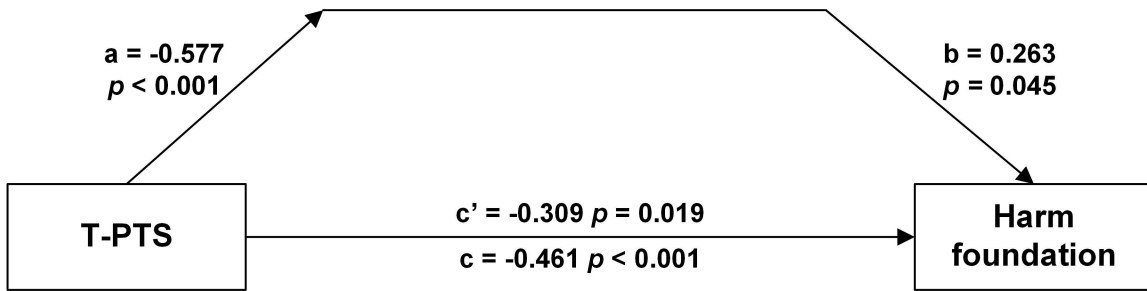

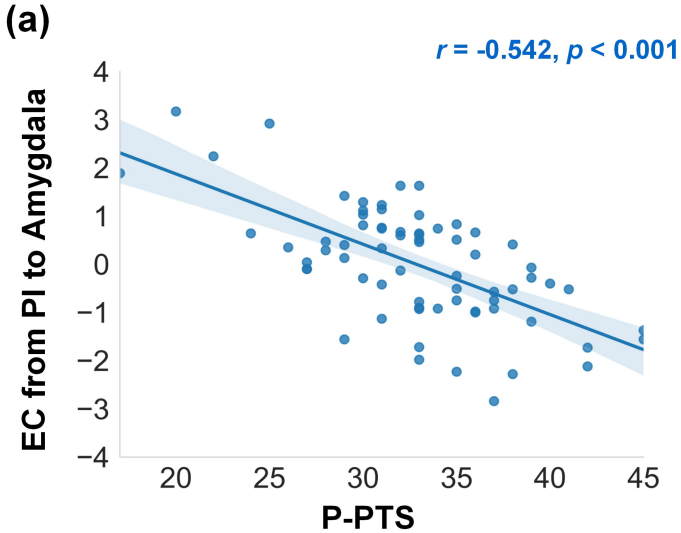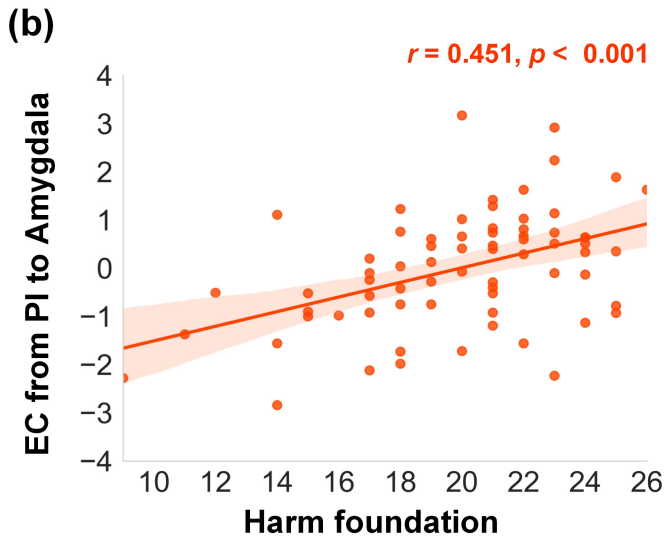

**(c)**

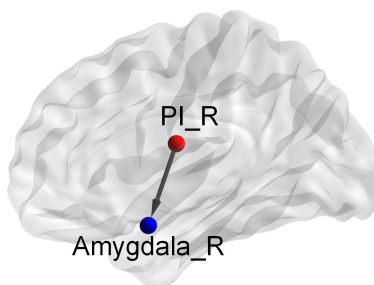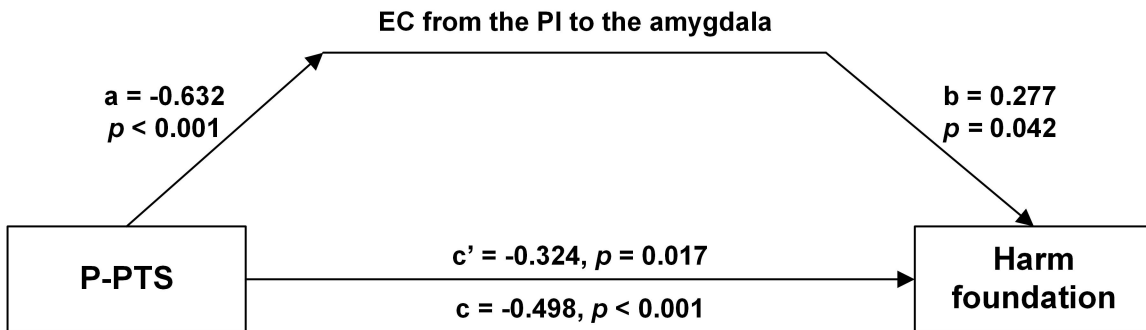

Source: http://biorxiv.org/content/10.1101/2021.06.21.449236v1.full.pdf
